# Supplementary material for: Reduction-free synthesis of stable acetylide cobalamins
Source: Royal Society of Chemistry journal article supplement (doi:10.1039/c3cc47210h), 2013-01-01

# Electronic Supporting Information

## Reduction-free synthesis of stable acetylide cobalamins

Mikołaj Chromiński,<sup>a</sup> Agnieszka Lewalska<sup>a</sup> and Dorota Gryko<sup>\*a</sup>

### Table of Contents

|                                                                          |     |
|--------------------------------------------------------------------------|-----|
| General information                                                      | S2  |
| Numbering of alkynylated B <sub>12</sub> derivatives                     | S3  |
| Preparation of compound <b>1</b>                                         | S4  |
| General procedure for preparation of compounds <b>2-5</b>                | S6  |
| Copies of NMR spectra of compound <b>1</b>                               | S12 |
| Copies of NMR spectra of compound <b>2</b>                               | S17 |
| Copies of NMR spectra of compounds <b>3, 4</b> and <b>5</b>              | S22 |
| Copies of HPLC chromatograms of compounds <b>1-5</b>                     | S28 |
| Stability tests                                                          | S31 |
| Crystallographic data and crystal structures of compounds <b>2, 3, 4</b> | S35 |

**General information:** Commercial vitamin B<sub>12</sub> and other reagents and solvents were used as received. Preparative chromatography was performed using Silica Gel 90 C18 (Fluka) and Silica Gel 90 C2 (Fluka). For preparative chromatography redistilled water and HPLC grade acetonitrile was used.

<sup>1</sup>H and <sup>13</sup>C NMR spectra were recorded at RT on Varian 600 MHz or Varian 500 MHz spectrometers with residual solvent peak as an internal standard.

UV- Vis spectra were recorded on Jenway 7315 spectrometer.

HRMS spectra were recorded SYNAPT G2-S HDMS (Waters) spectrometer

All reactions and product purity were monitored using HPLC method.

HPLC Measurement conditions: Column: Eurospher II 100-5 C18 250 mmx4.6 mm (Knauer) with a precolumn; detection: UV-Vis, wavelength:  $\lambda = 361$  nm; flow rate: 1ml/min; pressure: 10 Mpa, Temperature: 30 °C. HPLC method:

| Time [min] | H <sub>2</sub> O [ %] | MeCN [ %] |
|------------|-----------------------|-----------|
| Initial    | 99                    | 1         |
| 15         | 30                    | 70        |
| 30         | 30                    | 70        |

pH stability was performed by incubating solutions of compounds **2**, **3**, and **4** in buffers of pH ranging from 1 to 8 and (5x10<sup>-5</sup> M) and recording UV/Vis spectra.

Diffractions experiments were performed using Bruker APEX-II CCD apparatus and the crystal structure was solved using SHELXL-97 software.

# Numbering of alkynylated B<sub>12</sub> derivatives

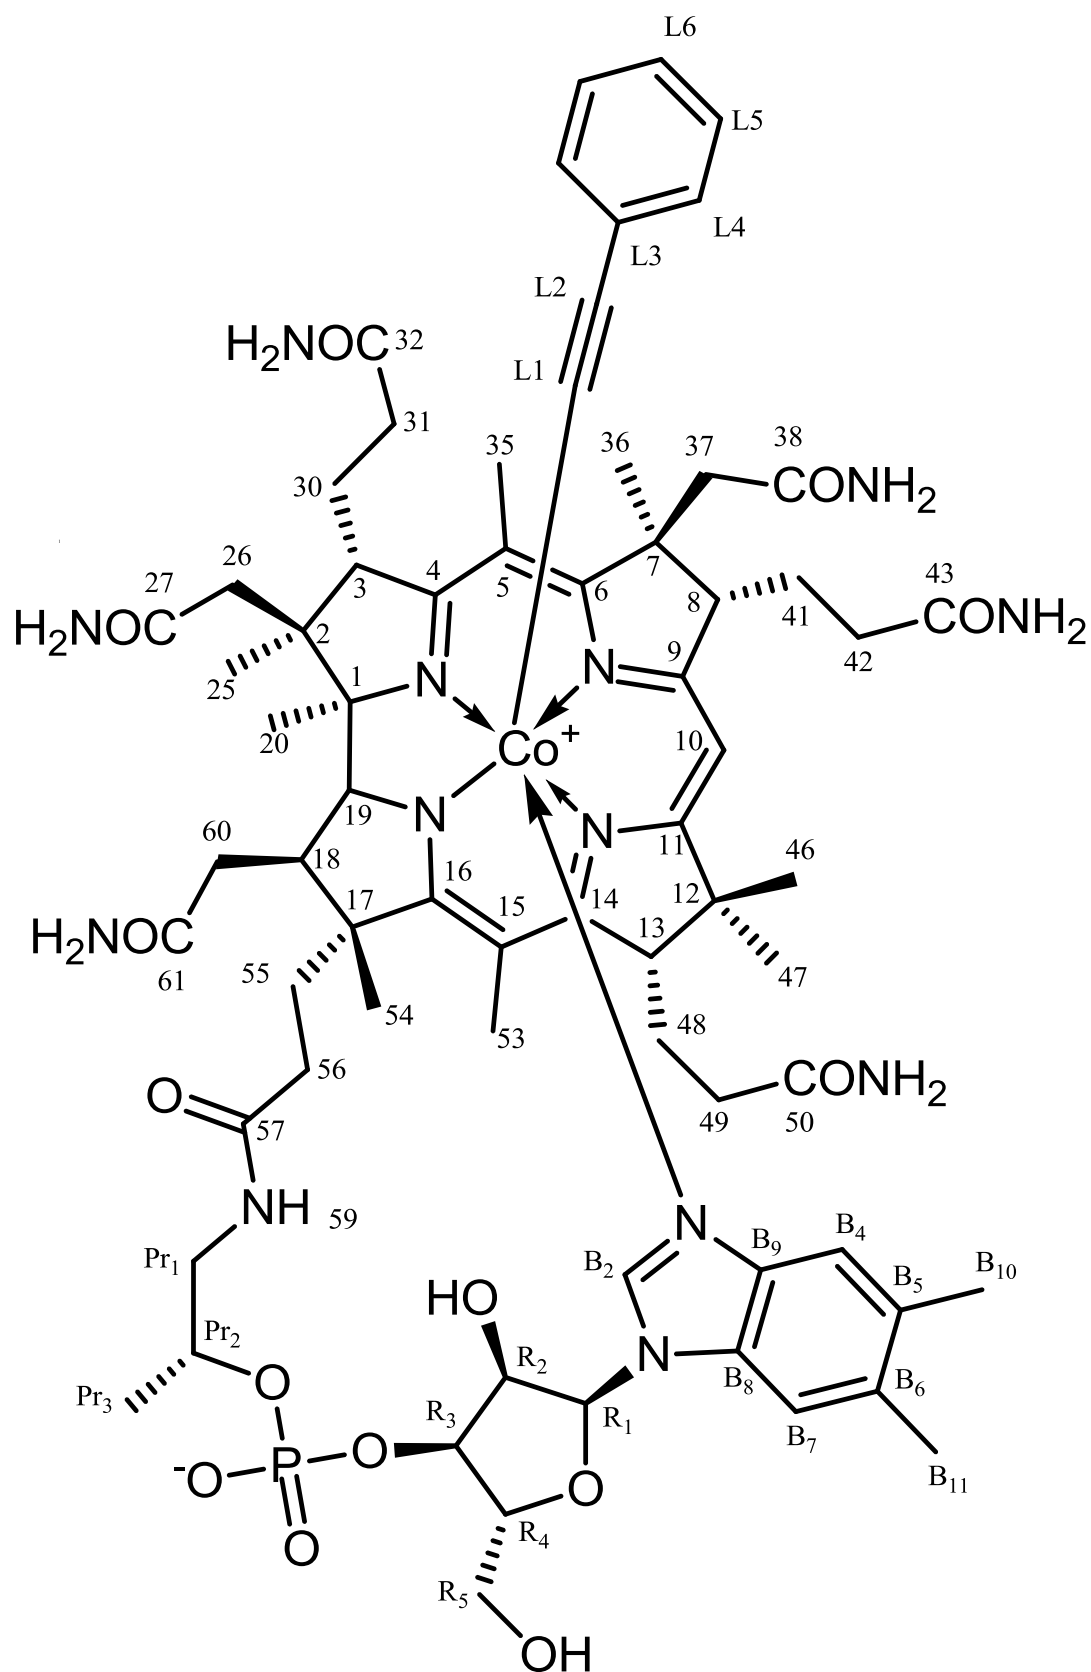

### Preparation of compound 1.

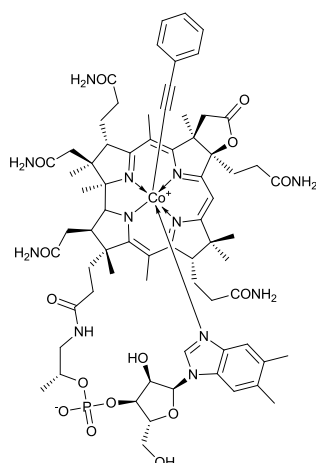

Vitamin B<sub>12</sub> (67 mg, 0.05 mmol), copper (I) acetylide (82 mg, 0.50 mmol) and Ph<sub>3</sub>P (130 mg, 0.50 mmol) were dissolved under argon in anhydrous DMF (5 ml). Then molecular sieves 4 Å (500 mg) were added. The reaction was placed in an oil bath, slowly heated to 60 °C and after reaching the set temperature stirred for 20 h. The reaction mixture was then filtered through a pad of Celite, the filtrate was precipitated with Et<sub>2</sub>O and centrifuged. The precipitate was washed twice with Et<sub>2</sub>O, centrifuged and dried under reduced pressure. The residue was dissolved in water, charged on RP C2 column and eluted with H<sub>2</sub>O/MeCN (10-70%). The collected fractions were immediately evaporated under reduced pressure without heating. Fractions containing pure product (HPLC analysis) were dissolved in MeOH, precipitated with Et<sub>2</sub>O, centrifuged and dried under reduced pressure. **1** was obtained as red crystals. Yield 15 mg (22%).

HRMS(ESI) m/z: calculated for C<sub>70</sub>H<sub>91</sub>N<sub>12</sub>O<sub>15</sub>PCo[M+H]<sup>+</sup> 1429.5796, found 1429.5784.

<sup>1</sup>H NMR (600 MHz, DMSO-[d<sub>6</sub>]) δ: 7.74 (s, 1H), 7.59 (s, 2H), 7.52 (s, 1H), 7.34 (s, 1H), 7.30 (s, 1H), 7.12 (s, 1H), 7.09 (s, 1H), 7.06 (s, 1H), 7.05-7.01 (m, 2H), 7.00-6.95 (m, 1H), 6.99-6.97 (m, 2H), 6.89 (s, 1H), 6.75 (s, 1H), 6.70 (m, 2H), 6.65 (s, 1H), 6.64 (s, 1H), 6.38 (s, 1H), 6.25 (s, 1H), 6.08 (s, 1H), 5.83 (s, 1H), 4.56 (s, *J* = 5.7 Hz, 1H), 4.51 (bs, 1H), 4.17 (d, *J* = 11.2 Hz, 1H), 4.10 (bs, 1H), 3.94 (s, 1H), 3.90-3.83 (m, 1H), 3.60-3.47 (m, 3H), 3.26 (d, *J* = 18.5 Hz, 1H), 3.07 (d, *J* = 11.1 Hz, 1H), 2.79-2.67 (m, 3H), 2.64 (m, 2H), 2.45-2.32 (m, 4H), 2.44 (s, 3H), 2.39 (s, 3H), 2.30-2.16 (m, 3H), 2.16-1.99 (m, 5H), 2.14 (s, 6H), 1.77 (s, 3H), 1.74-1.54 (m, 5H), 1.36 (s, 3H), 1.15 (s, 6H), 1.04 (d, *J* = 5.7 Hz, 3H), 0.93 (s, 3H), 0.33 (s, 3H) ppm.

<sup>13</sup>C NMR (150 MHz, DMSO-[d<sub>6</sub>]) δ: 178.5, 177.7, 176.8, 174.0, 173.7, 173.6, 173.1, 173.0, 172.5, 171.4, 166.2, 164.1, 160.9, 143.1, 137.3, 132.8, 131.6, 130.7, 130.3, 128.6, 126.8, 126.1, 116.9, 111.9, 105.9, 104.9, 100.4, 94.9, 90.5, 85.9, 84.9, 81.8, 75.4, 74.8, 71.3, 69.7, 62.0, 58.8, 55.2, 53.2, 51.5, 48.2, 47.0, 45.7, 41.9, 40.9, 38.3, 35.7, 34.1, 32.2, 31.7, 31.3, 30.3, 29.7, 29.0, 27.7, 25.9, 20.7, 20.4, 20.3, 19.7, 17.0, 16.9, 16.7, 15.5 ppm.

HPLC: τ = 12.52 min.

# <sup>1</sup>H and <sup>13</sup>C NMR assignments of lactone **1**

| Assignment       | <sup>13</sup> C NMR<br>[ppm] | Observed correlations |                          |
|------------------|------------------------------|-----------------------|--------------------------|
|                  |                              | HQSC<br>[ppm]         | HMBC                     |
| C4               | 178.5                        |                       | C35                      |
| C16              | 177.7                        |                       | C53, C54                 |
| C11              | 176.8                        |                       | C10, C13, C46, C47       |
|                  | 174.0                        |                       |                          |
|                  | 173.70                       |                       |                          |
| C27, C32, C38,   | 173.65                       |                       |                          |
| C43, C50, C57,   | 173.05                       |                       |                          |
| C61 <sup>b</sup> | 173.02                       |                       |                          |
|                  | 172.5                        |                       |                          |
|                  | 171.4                        |                       |                          |
| C9               | 166.2                        |                       | C10                      |
| C14              | 164.1                        |                       | C13, C53                 |
| C6               | 160.9                        |                       | C35, C36, C37            |
| B2               | 143.1                        | 7.09                  |                          |
| B9               | 137.3                        |                       | B2                       |
| B6               | 132.8                        |                       | B4, B10                  |
| B5               | 131.6                        |                       | B11                      |
| L4               | 130.7                        | 6.86                  | L6                       |
| B8               | 130.3                        |                       | B2, B4                   |
| L5               | 128.6                        | 7.04                  |                          |
| L3               | 126.8                        |                       | L5                       |
| L6               | 126.1                        | 6.98                  | L4                       |
| B4               | 116.9                        | 6.37                  | B11                      |
| B7               | 111.9                        | 7.30                  | B10                      |
| C5               | 105.9                        |                       | C35                      |
| C15              | 104.9                        |                       | C53                      |
| L2               | 100.4                        |                       | L4                       |
| C8               | 94.9                         |                       | C10, C 36, C37, C41, C42 |
| C10              | 90.5                         | 5.83                  |                          |
| R1               | 85.9                         | 6.25                  |                          |
| C1               | 84.9                         |                       | C3, C19, C20, C25        |
| R4               | 81.8                         | 3.88                  |                          |
| C19              | 75.4                         | 4.18                  | C20                      |
| R3               | 74.8                         | 4.51                  |                          |
| Pr2              | 71.3                         | 4.10                  | Pr3                      |
| R2               | 69.7                         | 3.94                  |                          |
| R5               | 62.0                         | 3.56                  |                          |
| C17              | 58.8                         |                       | C53, C54                 |
| C3               | 55.2                         | 4.56                  | C25                      |
| C13              | 53.2                         | 3.07                  | C46, C47                 |
| C7               | 51.5                         |                       | C36, C37                 |
| C12              | 48.2                         |                       | C13, C46, C47            |
| C2               | 47.0                         |                       | C20, C25                 |
| Pr1              | 45.7                         | 3.53, 2.71            | Pr3                      |
| C26              | 41.9                         | 2.12                  | C25                      |
| C37              | 40.9                         | 3.25, 2.64            | C36                      |
| C18              | 38.3                         | 2.72                  | C54                      |
| C31              | 35.7                         | 2.20                  |                          |
| C49              | 34.1                         | 2.36, 2.27            | C13                      |
| C60              | 32.2                         | 2.46                  |                          |
| C55              | 31.7                         | 1.73                  | C54                      |
| C46              | 31.3                         | 0.93                  | C13, C47                 |
| C56              | 30.3                         | 2.63, 2.03            |                          |
| C41              | 29.7                         | 1.61                  | C42                      |
| C42              | 29.0                         | 2.09, 1.94            | C41                      |
| C48              | 27.7                         | 1.92, 1.57            | C13                      |
| C30              | 25.9                         | 1.70                  | C31                      |
| Pr3              | 20.7                         | 1.04                  |                          |
| B10/B11          | 20.4                         | 2.14                  | B4/B7                    |
| C20              | 20.3                         | 0.33                  |                          |
| C47              | 20.3                         | 1.35                  |                          |
| C36              | 19.7                         | 1.77                  | C37, C41, C42            |
| C25              | 17.0                         | 1.15                  |                          |
| C35              | 16.9                         | 2.43                  |                          |
| C54              | 16.7                         | 1.15                  |                          |
| C53              | 15.5                         | 2.39                  |                          |

<sup>a</sup> Spectra were recorded on Varian 600 MHz spectrometer, residual solvent peaks (2.50 ppm and 39.52 ppm) were used as internal standards. <sup>b</sup> Amide carbonyl groups, cross peaks in HMBC unclear or overlap.

### **General procedure for the preparation of compounds 2, 3, 4 and 5.**

Vitamin B<sub>12</sub> (135 mg, 0.1 mmol), CuAcO (12 mg, 0.1 mmol) were dissolved in DMA (1.5 ml) followed by addition of the respective alkyne (1 mmol) and solution of DBU (76 µl, 0.5 mmol) in DMA (0.5 ml). The reaction mixture was vigorously stirred at room temperature for 4 hours and monitored by HPLC. When the reaction reached almost full conversion of the starting material, the reaction mixture was precipitated with Et<sub>2</sub>O (15 ml) and centrifuged. The resulting precipitate was washed twice with Et<sub>2</sub>O (2 x 15 ml) followed by centrifugation and drying on air. The resulting solid was then dissolved in distilled water (30 ml), centrifuged and the solution over the yellowish precipitate was collected and concentrated *in vacuo*. The solid was charged on RP C18 column and eluted with H<sub>2</sub>O/MeCN (10-70%). The second fraction containing the desired product was collected and concentrated *in vacuo*. The obtained red solid was dissolved in MeOH (2 ml), precipitated with Et<sub>2</sub>O, centrifuged and dried under reduced pressure at 50 °C.

### **Compound 2**

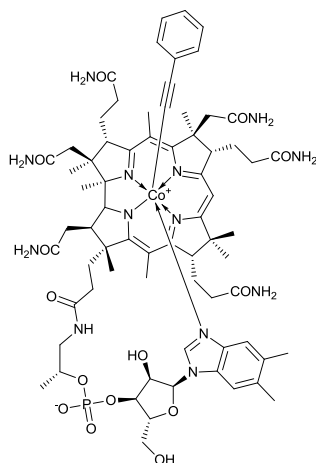

Yield: 114 mg, 85%.

HRMS(ESI) *m/z*: calculated for C<sub>70</sub>H<sub>93</sub>N<sub>13</sub>O<sub>14</sub>PCoNa [M+Na]<sup>+</sup> 1452.5932, found 1452.5931.

IR (KBr)  $\nu$  = 3333, 3189, 2967, 2937, 2123, 1666, 1574, 1496, 1217, 1151, 1068, 995, 847, 759 cm<sup>-1</sup>.

UV/Vis (H<sub>2</sub>O):  $\lambda_{\text{max}}$ , ( $\epsilon$ ) = 551 (7.5x10<sup>3</sup>), 522 (6.5x10<sup>3</sup>), 363 (1.3x10<sup>4</sup>), 259, 218 nm (L·mol<sup>-1</sup>·cm<sup>-1</sup>).

<sup>1</sup>H NMR (600 MHz, DMSO-[d<sub>6</sub>])  $\delta$ : 7.69 (s, 1H), 7.57 (s, 2H), 7.48 (s, 2H), 7.30 (s, 1H), 7.26 (s, 1H), 7.11 (s, 1H), 7.08 (s, 1H), 7.05-6.99 (m, 3H), 6.98-6.94 (m, 1H), 6.93 (s, 1H), 6.88 (s, 1H), 6.74 (s, 1H), 6.74-6.70 (m, 1H), 6.63 (s, 1H), 6.50 (s, 1H), 6.48 (s, 1H), 6.33-6.27 (m, 1H), 6.25 (s, 1H), 6.06 (bs, 1H), 5.83 (s, 1H), 4.58 (d, *J* = 6.2 Hz, 1H), 4.51-4.41 (m, 1H), 4.20 (d, *J* = 11.0 Hz, 1H), 4.11-4.04 (m, 1H), 3.92-3.38 (m, 2H), 3.75 (dd, *J* = 5.5, *J* = 9.6 Hz, 1H), 3.60-3.49 (m, 3H), 3.03 (d, *J* = 11.1 Hz, 1H), 2.74-2.56 (m, 3H), 2.46-2.31 (m, 5H), 2.44 (s, 3H), 2.36 (s, 3H), 2.28-2.08 (m, 4H), 2.14 (s, 3H), 2.13 (s, 3H), 2.08-1.99 (m, 1H), 1.94-1.82 (m, 4H), 1.80-1.66 (m, 4H), 1.64 (s, 3H), 1.60-1.49 (m, 2H), 1.32 (s, 3H), 1.25-1.17 (m, 1H), 1.16 (s, 3H), 1.14 (s, 3H), 1.01 (d, *J* = 5.9 Hz, 3H), 0.95 (s, 4H), 0.29 (s, 3H) ppm.

<sup>13</sup>C NMR (150 MHz, DMSO-[d<sub>6</sub>])  $\delta$ : 178.3, 176.9, 174.1, 173.99, 173.74, 173.35, 173.23, 173.10, 172.7, 171.80, 171.5, 164.9, 164.3, 143.1, 137.3, 132.3, 131.1, 130.7, 130.2, 128.5, 127.3, 125.7, 117.4, 111.5, 105.6, 103.1, 100.3, 93.6, 85.2, 84.7, 81.7, 75.1, 74.8, 71.1, 69.7, 62.3, 58.7, 55.1, 53.9,

53.4, 50.4, 47.6, 46.8, 45.9, 42.2, 42.0, 38.3, 35.7, 34.2, 32.5, 32.4, 31.8, 31.6, 30.3, 27.7, 26.4, 26.0, 20.7, 20.34, 20.32, 20.2, 19.2, 16.9, 16.8, 16.1, 15.4 ppm.

HPLC:  $\tau$  = 11.72 min.

# <sup>1</sup>H and <sup>13</sup>C NMR assignments of compound **2**

| Assignment                                           | <sup>13</sup> C NMR<br>[ppm]              | Observed correlations |                    |
|------------------------------------------------------|-------------------------------------------|-----------------------|--------------------|
|                                                      |                                           | HQSC<br>[ppm]         | HMBC               |
| C4                                                   | 178.3                                     |                       | C35                |
| C16                                                  | 176.9                                     |                       | C13, C54, C53      |
| C11                                                  | 174.1                                     |                       | C10, C13, C46, C47 |
| C27, C32, C38,<br>C43, C50, C57,<br>C61 <sup>b</sup> | 173.7<br>173.5<br>173.3<br>173.2<br>173.1 |                       |                    |
| C9                                                   | 172.7                                     |                       | C8, C10            |
| C27, C32, C38,<br>C43, C50, C57,<br>C61 <sup>b</sup> | 171.8<br>171.5                            |                       |                    |
| C6                                                   | 164.9                                     |                       | C8, C35            |
| C14                                                  | 164.3                                     |                       | C13, C53           |
| B2                                                   | 143.1                                     | 7.07                  |                    |
| B9                                                   | 137.3                                     |                       | B7, B2             |
| B6                                                   | 132.3                                     |                       | B4, B10            |
| B5                                                   | 131.1                                     |                       | B7, B11            |
| L4                                                   | 130.7                                     | 6.72                  | L6                 |
| B8                                                   | 130.2                                     |                       | B2, B4             |
| L5                                                   | 128.5                                     | 7.03                  |                    |
| L3                                                   | 127.3                                     |                       | L5                 |
| L4                                                   | 125.7                                     | 6.95                  | L4                 |
| B4                                                   | 117.4                                     | 6.48                  | B11                |
| B7                                                   | 111.5                                     | 7.26                  | B10                |
| C5                                                   | 105.6                                     |                       | C35                |
| C15                                                  | 103.1                                     |                       | C53                |
| L2                                                   | 100.3                                     |                       | L4                 |
| C10                                                  | 93.6                                      | 5.85                  |                    |
| R1                                                   | 85.24                                     | 6.24                  |                    |
| C1                                                   | 84.7                                      |                       | C3, C19, C20, C25  |
| R4                                                   | 81.7                                      | 3.87                  |                    |
| R3                                                   | 75.1                                      | 4.46                  | R2, R5             |
| C19                                                  | 74.8                                      | 4.21                  | C20                |
| Pr2                                                  | 71.1                                      | 4.08                  | Pr3                |
| R2                                                   | 69.7                                      | 3.88                  |                    |
| R5                                                   | 62.3                                      | 3.55                  |                    |
| C7                                                   | 58.7                                      |                       | C54, C60           |
| C3                                                   | 55.1                                      | 4.58                  | C25, C26           |
| C8                                                   | 53.9                                      | 3.74                  | C10, C36, C37      |
| C13                                                  | 53.4                                      | 3.04                  | C46, C47, C49      |
| C7                                                   | 50.3                                      |                       | C8, C36, C37,      |
| C12                                                  | 47.6                                      |                       | C10, C46, C47      |
| C2                                                   | 46.8                                      |                       | C20, C25           |
| Pr1                                                  | 45.9                                      | 3.53, 2.44            | Pr3                |
| C37                                                  | 42.2                                      | 2.37, 1.73            | C36                |
| C26                                                  | 42.0                                      | 2.13                  | C25                |
| C18                                                  | 38.3                                      | 2.70                  | C54                |
| C31                                                  | 35.7                                      | 2.22                  |                    |
| C49                                                  | 34.2                                      | 2.35, 2.26            |                    |
| C60                                                  | 32.5                                      | 2.44                  | C55                |
| C42                                                  | 32.4                                      | 1.55, 1.21            |                    |
| C55                                                  | 31.8                                      | 2.38, 1.72            | C54                |
| C46                                                  | 31.6                                      | 0.94                  | C47                |
| C56                                                  | 30.3                                      | 2.63, 2.04            |                    |
| C48                                                  | 27.7                                      | 1.89, 1.54            | C13, C49           |
| C41                                                  | 26.4                                      | 1.70, 0.94            | C8, C42            |
| C30                                                  | 26.0                                      | 1.70, 1.64            | C3, C31            |
| Pr3                                                  | 20.7                                      | 1.01                  |                    |
| B11                                                  | 20.34                                     | 2.13                  | B7                 |
| B10                                                  | 20.32                                     | 2.14                  | B4                 |
| C20                                                  | 20.2                                      | 0.29                  |                    |
| C36                                                  | 19.2                                      | 1.64                  | C41                |
| C54                                                  | 16.9                                      | 1.16                  |                    |
| C25                                                  | 16.8                                      | 1.14                  |                    |
| C35                                                  | 16.1                                      | 2.43                  |                    |
| C53                                                  | 15.4                                      | 2.36                  |                    |

<sup>a</sup> Spectra were recorded on Varian 600 MHz spectrometer, residual solvent peaks (2.50 ppm and 39.52 ppm) were used as internal standards. <sup>b</sup> Amide carbonyl groups, cross peaks in HMBC unclear or overlap.



### Compound 3

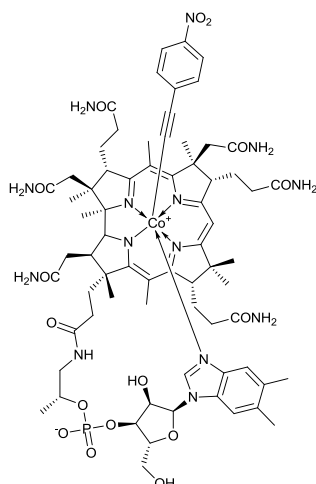

Yield: 132 mg, 90%.

HRMS(ESI)  $m/z$ : calculated for  $C_{70}H_{92}N_{14}O_{16}P\text{CoNa}$   $[M+Na]^+$  1497.5783, found 1497.5770.

IR (KBr)  $\nu$  = 3319, 3189, 2968, 2938, 2119, 1668, 1573, 1499, 1402, 1337, 1214, 1146, 1107, 1065, 996, 856, 750  $\text{cm}^{-1}$ .

UV/Vis ( $\text{H}_2\text{O}$ ):  $\lambda_{\text{max}}$ , ( $\epsilon$ ) = 549 ( $6.8 \times 10^3$ ), 522 ( $5.3 \times 10^3$ ), 363 ( $1.7 \times 10^4$ ), 263, 216 nm ( $\text{L} \cdot \text{mol}^{-1} \cdot \text{cm}^{-1}$ ).

$^1\text{H}$  NMR (500 MHz,  $\text{DMSO}-[d_6]$ )  $\delta$ : 7.97 (s, 1H), 7.95 (s, 1H), 7.68 (s, 1H), 7.58 (s, 1H), 7.54 (s, 1H), 7.50 (s, 1H), 7.32 (s, 1H), 7.30 (s, 1H), 7.14 (s, 1H), 7.09 (s, 1H), 7.05 (s, 1H), 6.96 (s, 1H), 6.93 (s, 1H), 6.98 (s, 1H), 6.76 (s, 1H), 6.66 (s, 1H), 6.52 (s, 1H), 6.49 (s, 1H), 6.37-6.29 (m, 1H), 6.27 (s, 1H), 6.07 (s, 1H), 5.87 (s, 1H), 4.56 (d,  $J$  = 6.8 Hz, 1H), 4.51-4.44 (m, 1H), 4.18-4.03 (m, 2H), 3.95-3.83 (m, 2H), 3.78 (dd,  $J$  = 5.3,  $J$  = 9.6 Hz, 1H), 3.64-3.49 (m, 3H), 3.07 (d,  $J$  = 10.8 Hz, 1H), 2.77-2.56 (m, 3H), 2.47-2.32 (m, 5H), 2.46 (s, 3H), 2.39 (s, 3H), 2.31-2.22 (m, 4H), 2.18 (s, 3H), 2.16 (s, 3H), 2.12-1.98 (m, 4H), 1.95-1.69 (m, 6H), 1.66 (s, 2H), 1.61-1.51 (m, 2H), 1.34 (s, 3H), 1.26-1.19 (m, 2H), 1.18 (s, 3H), 1.17 (s, 3H), 1.04 (d,  $J$  = 6.1 Hz, 3H), 0.97 (s, 4H), 0.31 (s, 3H) ppm.

$^{13}\text{C}$  NMR (125 MHz,  $\text{DMSO}-[d_6]$ )  $\delta$ : 178.6, 177.3, 174.4, 174.0, 173.7, 173.3, 173.09, 173.1, 171.7, 171.4, 165.2, 164.4, 144.9, 143.1, 137.2, 133.9, 132.5, 131.5, 131.2, 130.2, 124.1, 117.3, 111.6, 105.6, 103.2, 100.9, 93.7, 85.7, 84.7, 81.8, 75.1, 74.8, 71.1, 69.7, 62.3, 58.8, 55.2, 54.0, 53.4, 50.3, 49.0, 47.7, 46.8, 45.9, 42.1, 38.4, 35.7, 34.2, 32.5, 32.4, 31.7, 30.4, 27.7, 26.4, 26.0, 20.7, 20.4, 20.3, 20.14, 19.2, 19.0, 16.9, 16.1, 15.4 ppm.

HPLC:  $\tau$  = 12.08 min.

## Compound 4

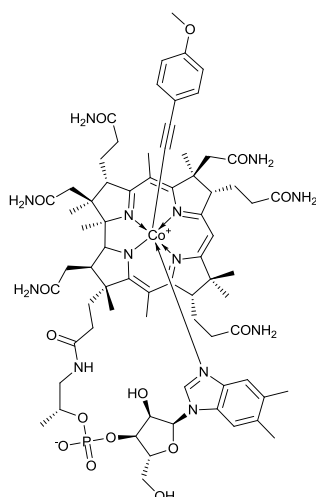

Yield: 116 mg, 80%.

HRMS(ESI)  $m/z$ : calculated for  $C_{71}H_{95}N_{13}O_{15}P\text{CoNa}$   $[M+Na]^+$  1482.6032, found 1482.6035.

IR (KBr)  $\nu$  = 3333, 3193, 2968, 2940, 2123, 1667, 1573, 1504, 1402, 1350, 1281, 1240, 1213, 1147, 1104, 1068, 997, 927, 903, 868, 834, 812, 729  $\text{cm}^{-1}$ .

UV/Vis ( $\text{H}_2\text{O}$ ):  $\lambda_{\text{max}}$ , ( $\epsilon$ ) = 550 ( $5.8 \times 10^3$ ), 522 ( $4.4 \times 10^3$ ), 364 ( $1.2 \times 10^4$ ), 262, 218 nm ( $\text{L} \cdot \text{mol}^{-1} \cdot \text{cm}^{-1}$ ).

$^1\text{H}$  NMR (500 MHz,  $\text{DMSO}-[d_6]$ )  $\delta$ : 7.65 (s, 1H), 7.60 (s, 1H), 1.50 (s, 3H), 7.32 (s, 1H), 1.29 (s, 1H), 7.16 (s, 1H), 7.10 (s, 1H), 7.05 (s, 1H), 6.96 (s, 1H), 6.86 (s, 1H), 6.76 (s, 1H), 6.70-6.60 (m, 5H), 6.52 (s, 1H), 6.50 (s, 1H), 6.39-6.32 (m, 1H), 6.26 (s, 1H), 6.05 (s, 1H), 5.85 (s, 1H), 4.59 (d,  $J$  = 8.1 Hz, 1H), 4.54-4.42 (m, 1H), 4.21 (d,  $J$  = 11.0 Hz, 1H), 4.17-4.05 (m, 1H), 3.39-3.85 (m, 2H), 3.75 (dd,  $J$  = 5.3,  $J$  = 9.9 Hz, 1H), 3.63 (s, 3H), 3.61-3.52 (m, 3H), 3.05 (d,  $J$  = 11.5 Hz, 1H), 2.72-2.57 (m, 3H), 2.49-2.35 (m, 5H), 2.46 (s, 3H), 2.39 (s, 3H), 2.32-2.20 (m, 6H), 2.18 (s, 3H), 2.16 (s, 3H), 2.12-2.01 (m, 1H), 1.95-1.82 (m, 1H), 1.83-1.50 (m, 6H), 1.67 (s, 3H), 1.35 (s, 3H), 1.29-1.20 (m, 1H), 1.18 (s, 3H), 1.17 (s, 3H), 1.06 (d,  $J$  = 6.3 Hz, 3H), 0.97 (s, 4H), 0.31 (s, 3H) ppm.

$^{13}\text{C}$  NMR (125 MHz,  $\text{DMSO}-[d_6]$ )  $\delta$ : 178.2, 176.8, 174.0, 173.8, 173.4, 173.2, 173.1, 172.7, 171.9, 171.5, 164.8, 164.2, 157.5, 143.2, 137.3, 132.3, 131.9, 131.1, 130.2, 119.8, 117.4, 114.1, 110.0, 105.6, 103.1, 99.5, 93.5, 85.7, 84.7, 75.1, 74.7, 69.7, 62.3, 58.7, 55.5, 55.0, 54.0, 53.4, 50.4, 47.6, 46.7, 45.9, 42.3, 35.7, 34.2, 32.5, 32.4, 31.6, 26.4, 26.0, 20.7, 20.3, 20.2, 20.1, 19.3, 16.9, 16.8, 16.2, 15.4 ppm.

HPLC:  $\tau$  = 11.68 min.

## Compound 5

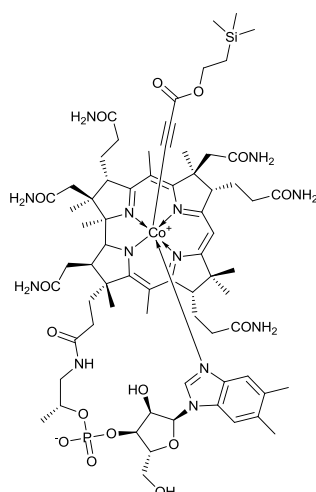

Yield: 127 mg, 85%.

HRMS(ESI)  $m/z$ : calculated for  $C_{70}H_{102}N_{13}O_{16}PCoSi$   $[M+H]^+$  1498.6406, found 1498.6396.

UV/Vis ( $H_2O$ ):  $\lambda_{max}$ , ( $\epsilon$ ) = 547 ( $5.3 \times 10^3$ ), 522 ( $4.3 \times 10^3$ ), 367 ( $9.6 \times 10^3$ ), 269, 215 nm ( $L \cdot mol^{-1} \cdot cm^{-1}$ ).

IR (KBr)  $\nu$  = 3348, 3195, 2952, 2121, 1667, 1573, 1497, 1402, 1223, 1146, 1068, 1000, 841, 756  $cm^{-1}$ .

$^1H$  NMR (500 MHz,  $DMSO-[d_6]$ )  $\delta$ : 7.62 (s, 1H), 7.59 (s, 1H), 7.54 (s, 2H), 7.50 (s, 1H), 7.30 (s, 2H), 7.14 (s, 1H), 7.10 (s, 1H), 7.06 (s, 1H), 6.99 (s, 1H), 6.75 (s, 1H), 6.63 (s, 1H), 6.50 (s, 1H), 6.46 (s, 1H), 6.40-6.32 (m, 1H), 6.28 (s, 1H), 6.09 (s, 1H), 5.85 (s, 1H), 4.59 (d,  $J$  = 6.7 Hz, 1H), 4.52-4.44 (m, 1H), 4.15-4.05 (m, 1H), 4.03 (d,  $J$  = 11.1 Hz, 1H), 3.94-3.84 (m, 4H), 3.80 (dd,  $J$  = 5.5,  $J$  = 9.8 Hz, 1H), 3.66-3.48 (m, 3H), 3.08 (d,  $J$  = 11.1 Hz, 1H), 2.76-2.57 (m, 3H), 2.48-2.35 (m, 4H), 2.47 (s, 3H), 2.39 (s, 3H), 2.31-1.97 (m, 5H), 2.18 (s, 3H), 2.16 (s, 3H), 1.97-1.84 (m, 1H), 1.82-1.70 (m, 4H), 1.67 (s, 3H), 1.64-1.46 (m, 6H), 1.33 (s, 3H), 1.25-1.14 (m, 1H), 1.18 (s, 3H), 1.16 (s, 3H), 1.06 (d,  $J$  = 6.2 Hz, 3H), 1.01 (s, 3H), 0.97-0.85 (m, 1H), 0.78-0.67 (m, 2H), 0.29 (s, 3H), -0.08 (s, 9H) ppm.

$^{13}C$  NMR (125 MHz,  $DMSO-[d_6]$ )  $\delta$ : 178.3, 177.1, 174.2, 173.4, 173.2, 172.9, 172.79, 172.7, 172.5, 171.3, 170.7, 164.9, 164.1, 151.4, 142.6, 136.6, 132.1, 130.8, 129.7, 116.7, 111.2, 105.2, 102.7, 93.2, 85.3, 84.3, 81.3, 74.7, 74.3, 70.6, 69.2, 62.0, 61.7, 58.3, 54.7, 53.3, 52.9, 49.9, 47.2, 46.3, 45.4, 41.7, 37.8, 35.1, 33.7, 31.9, 31.3, 29.8, 27.1, 26.0, 25.5, 20.3, 19.9, 19.8, 19.6, 18.7, 16.4, 16.2, 15.6, 14.9, -1.5 ppm.

HPLC:  $\tau$  = 13.25 min.



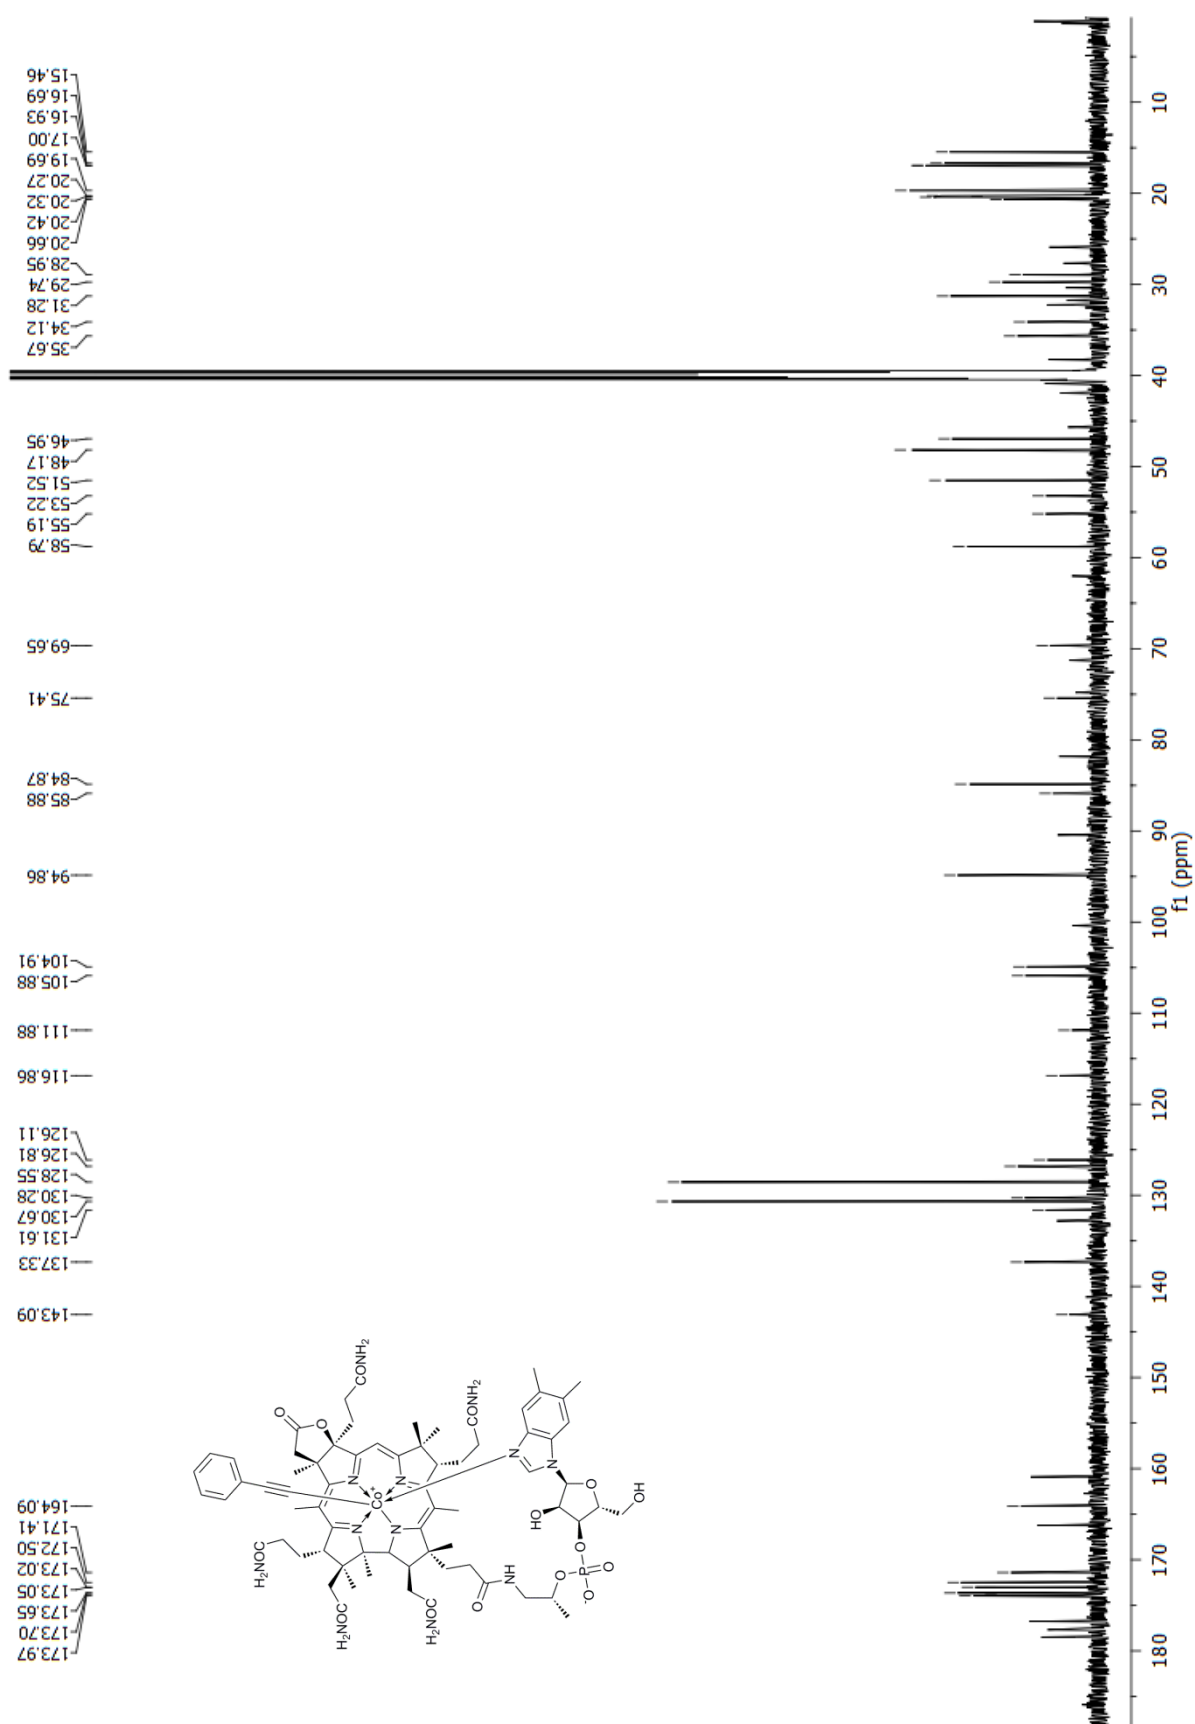

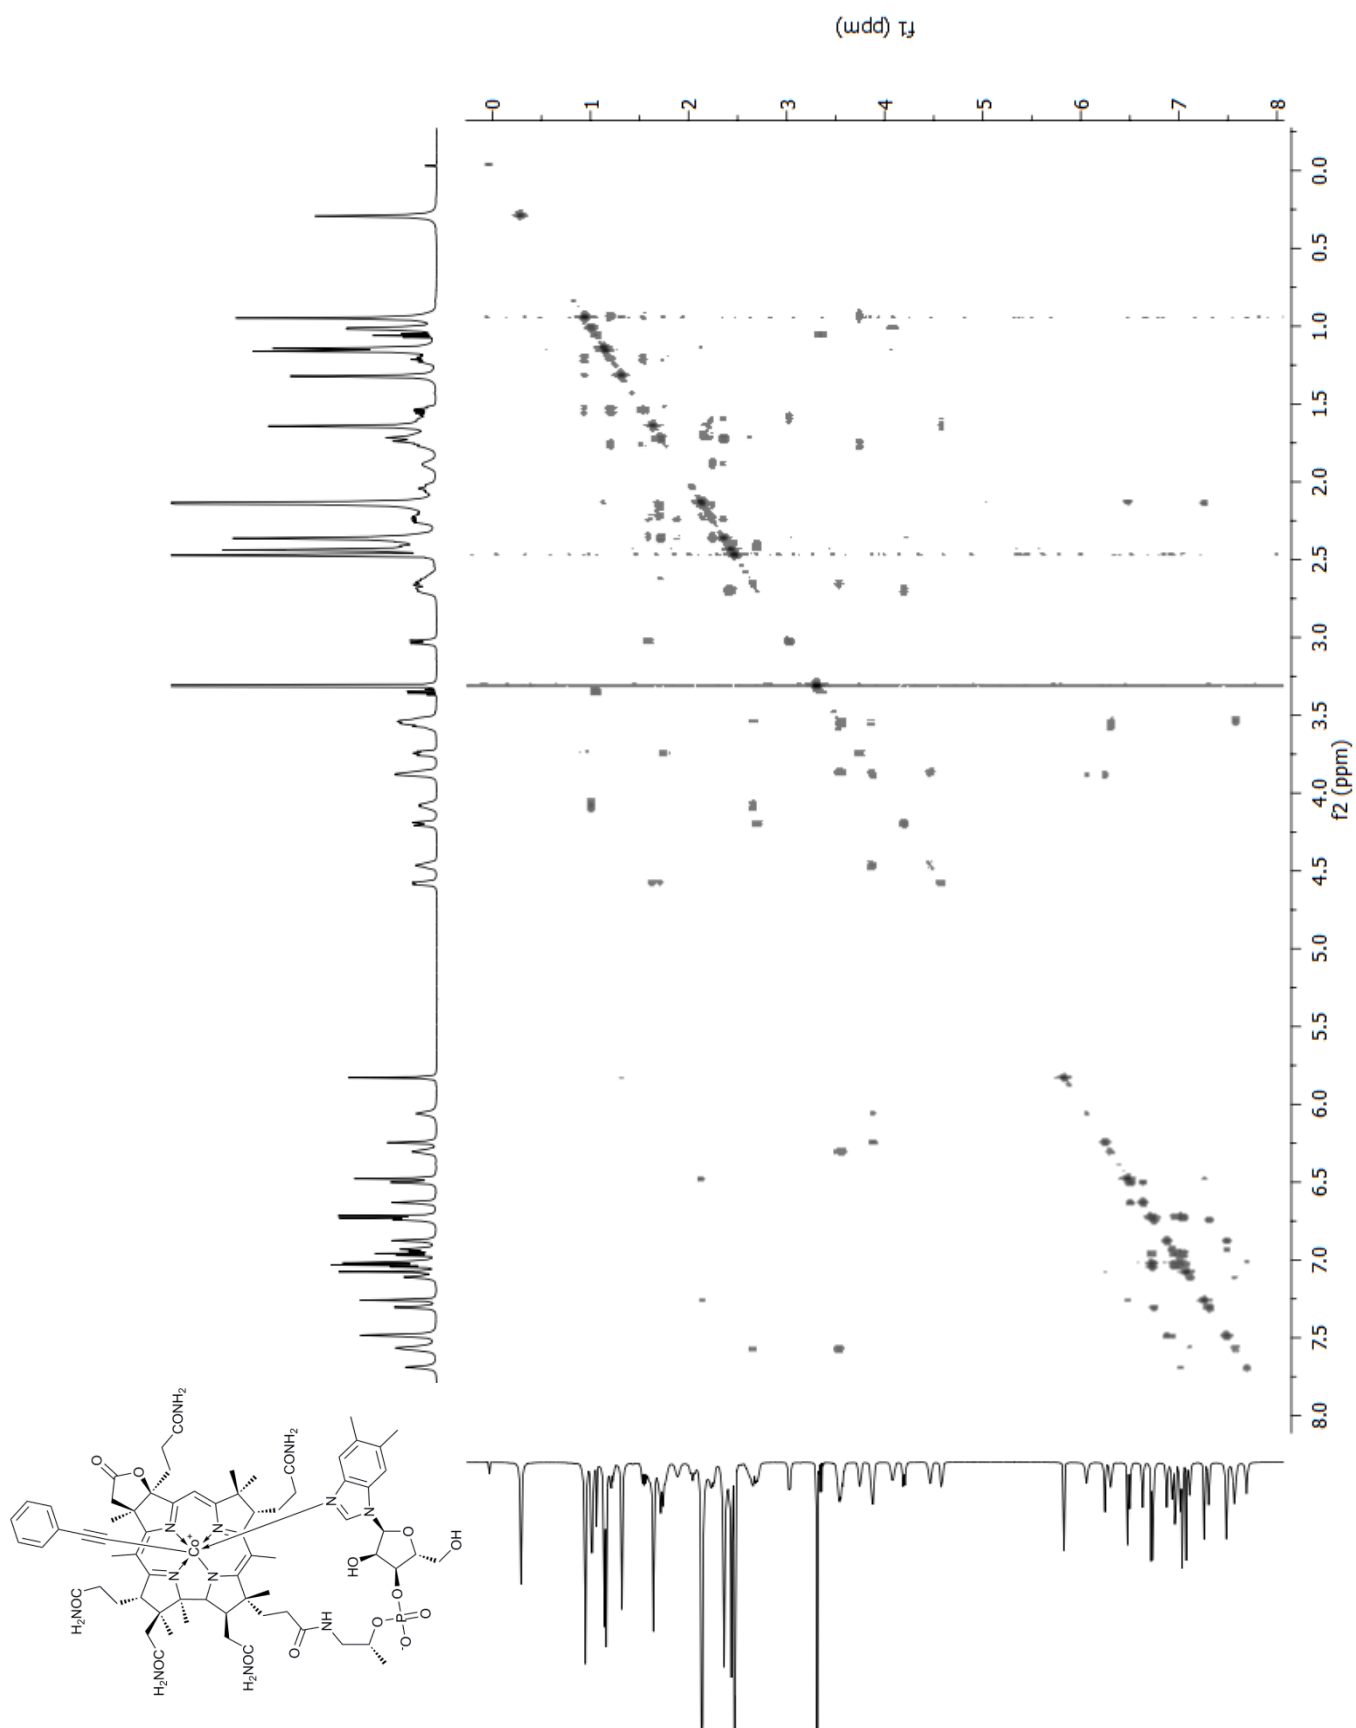

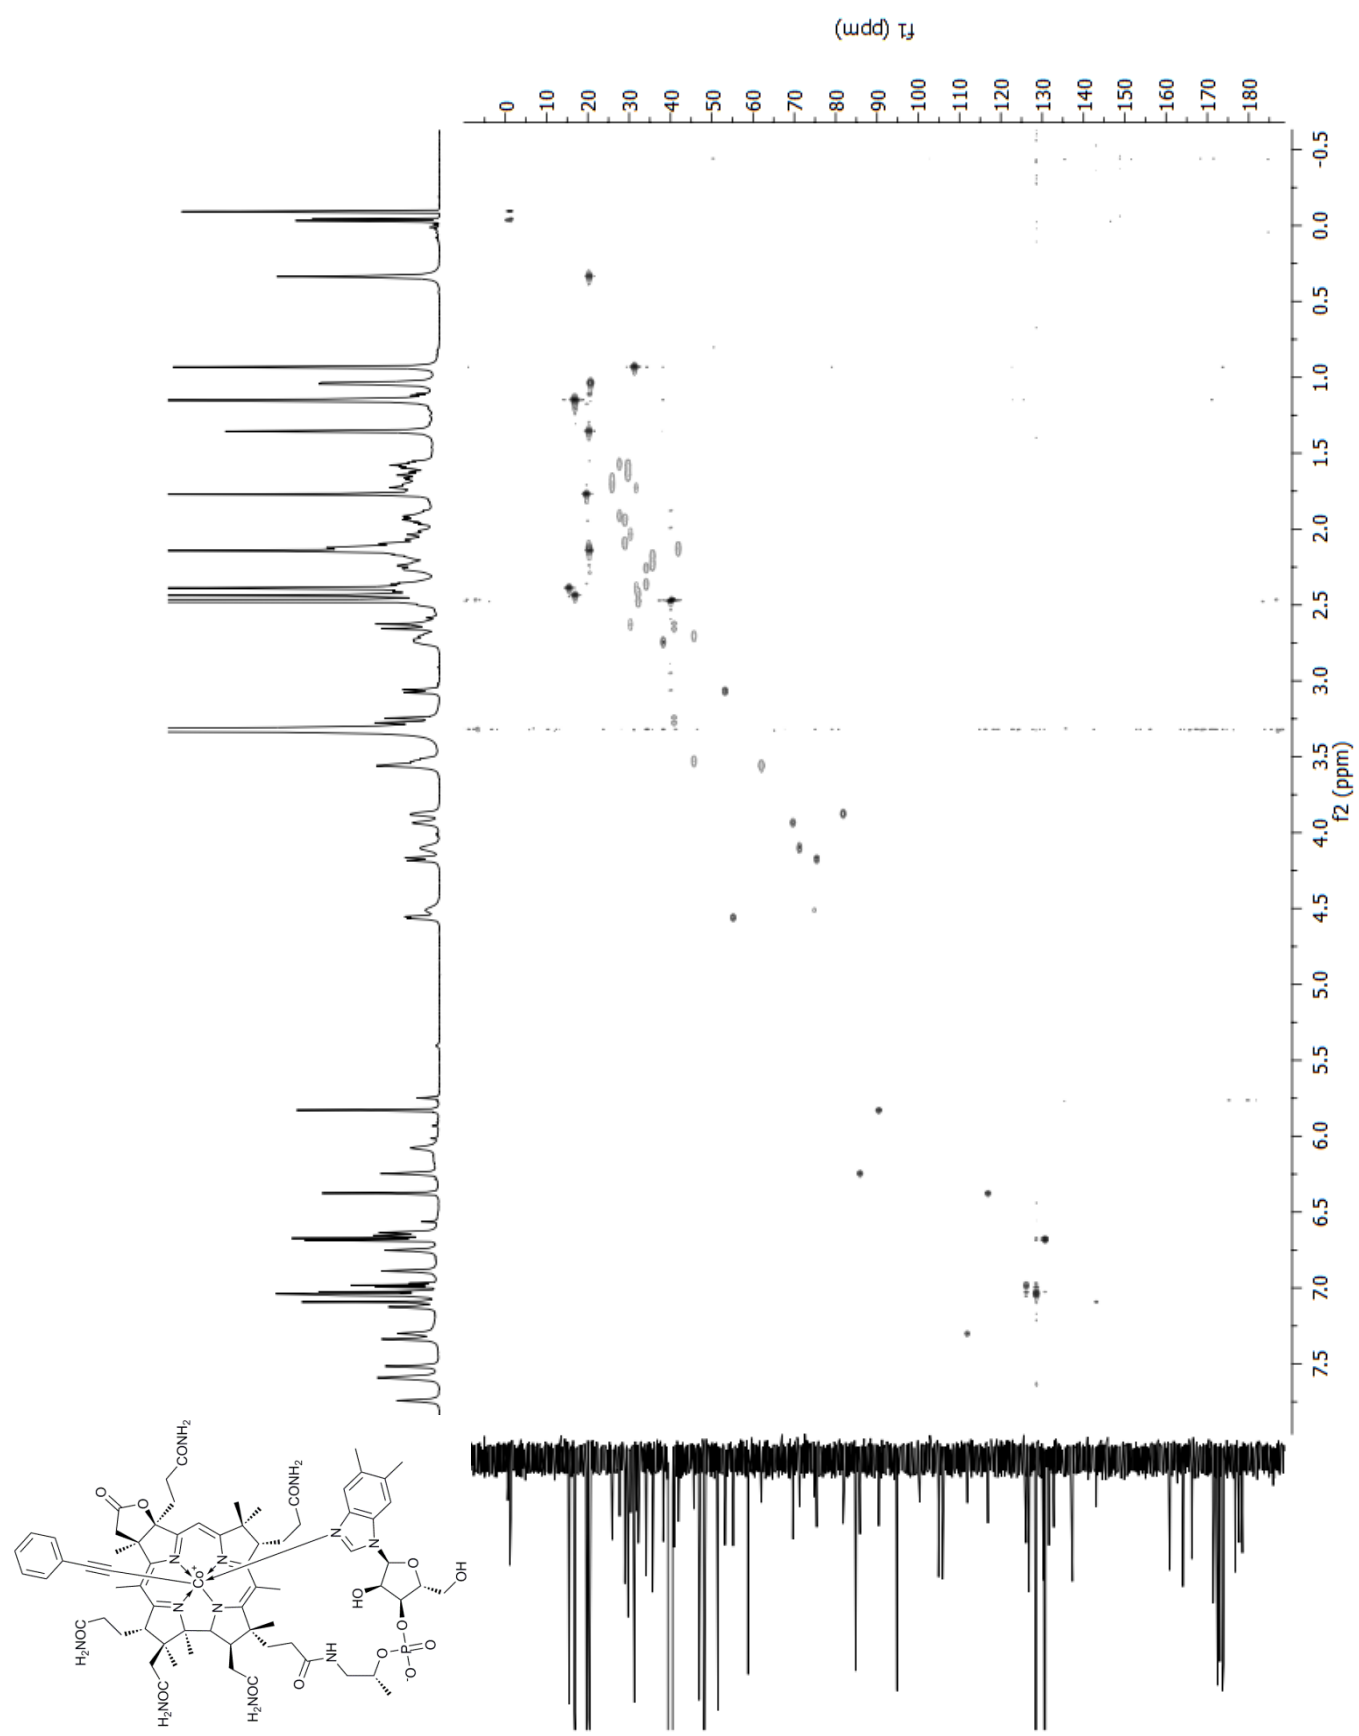

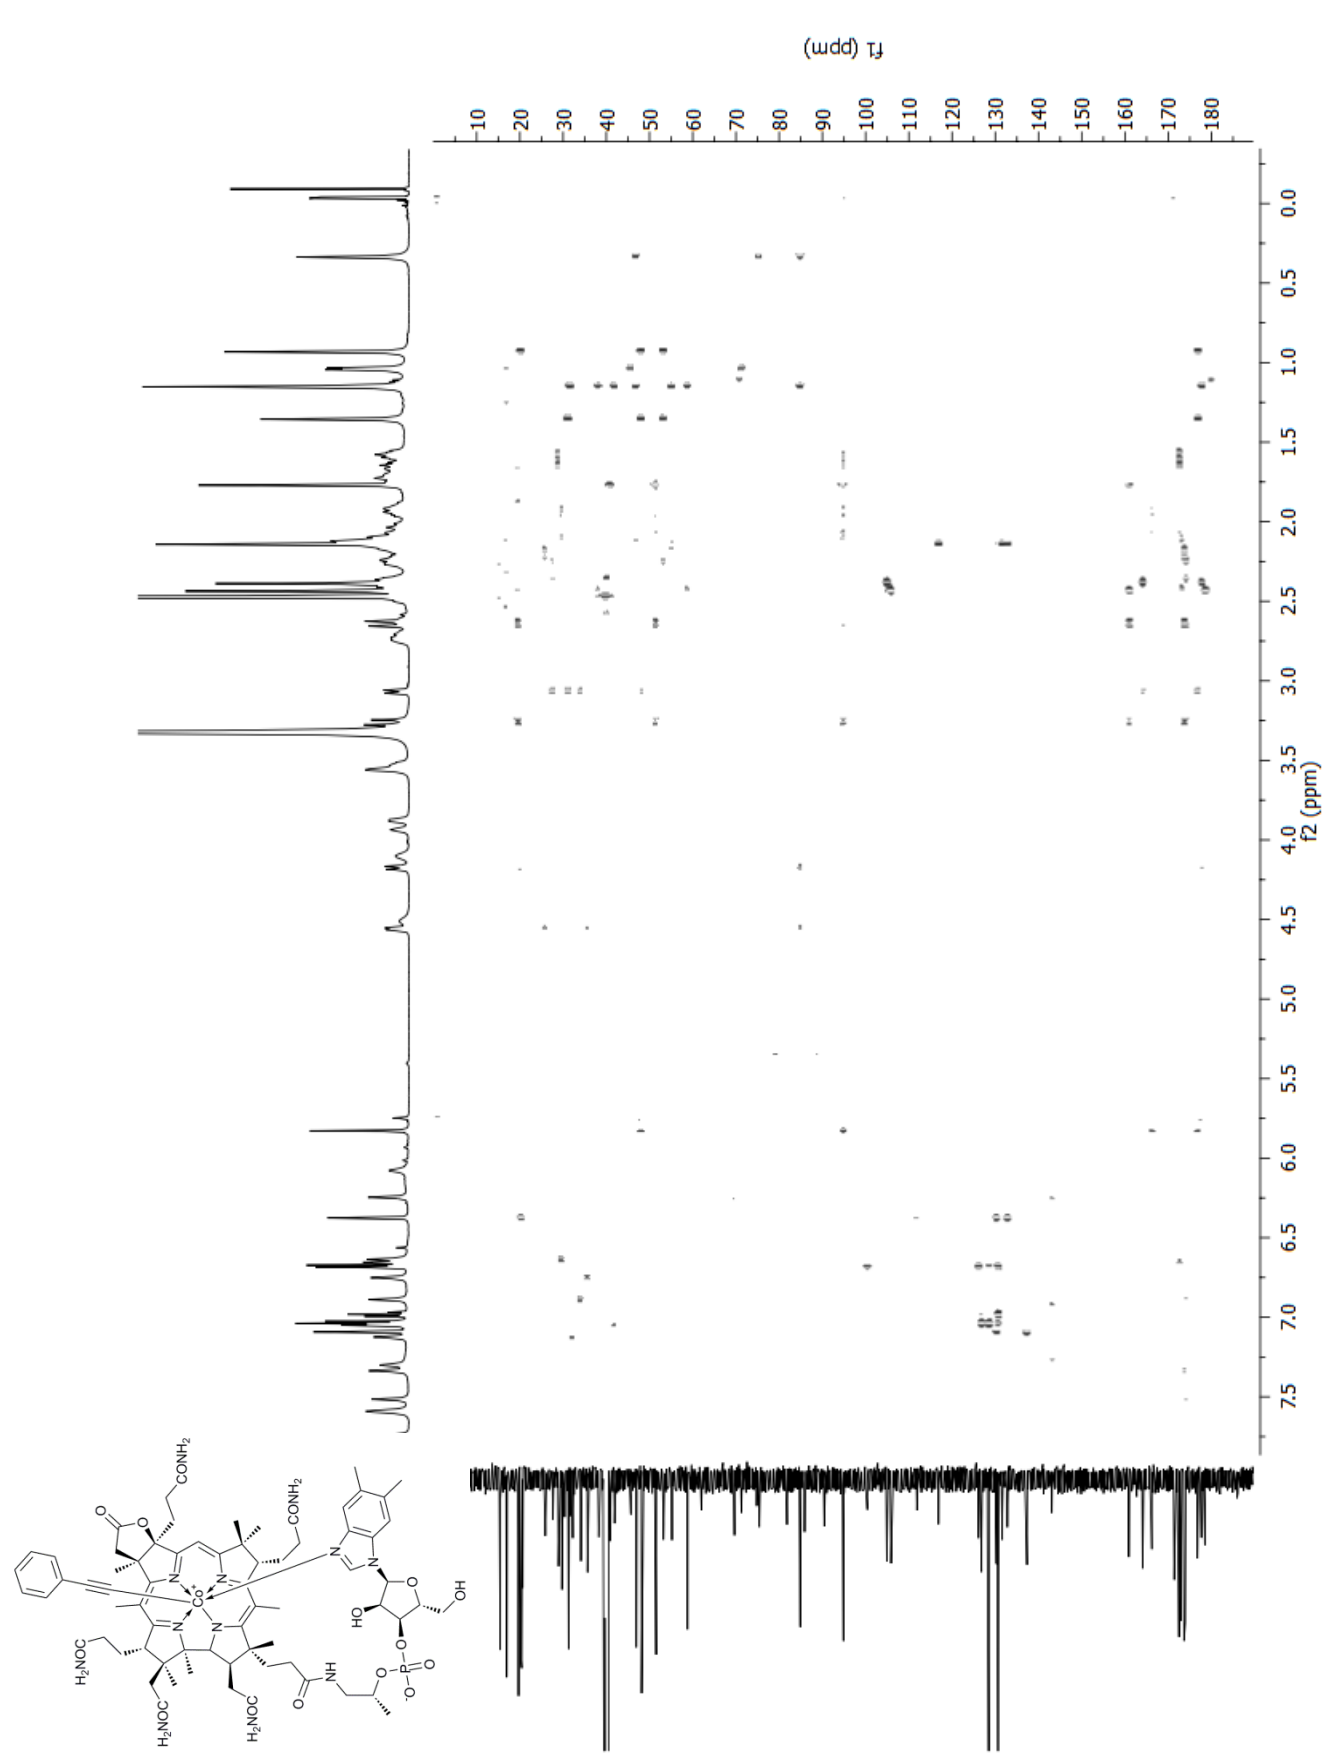



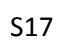

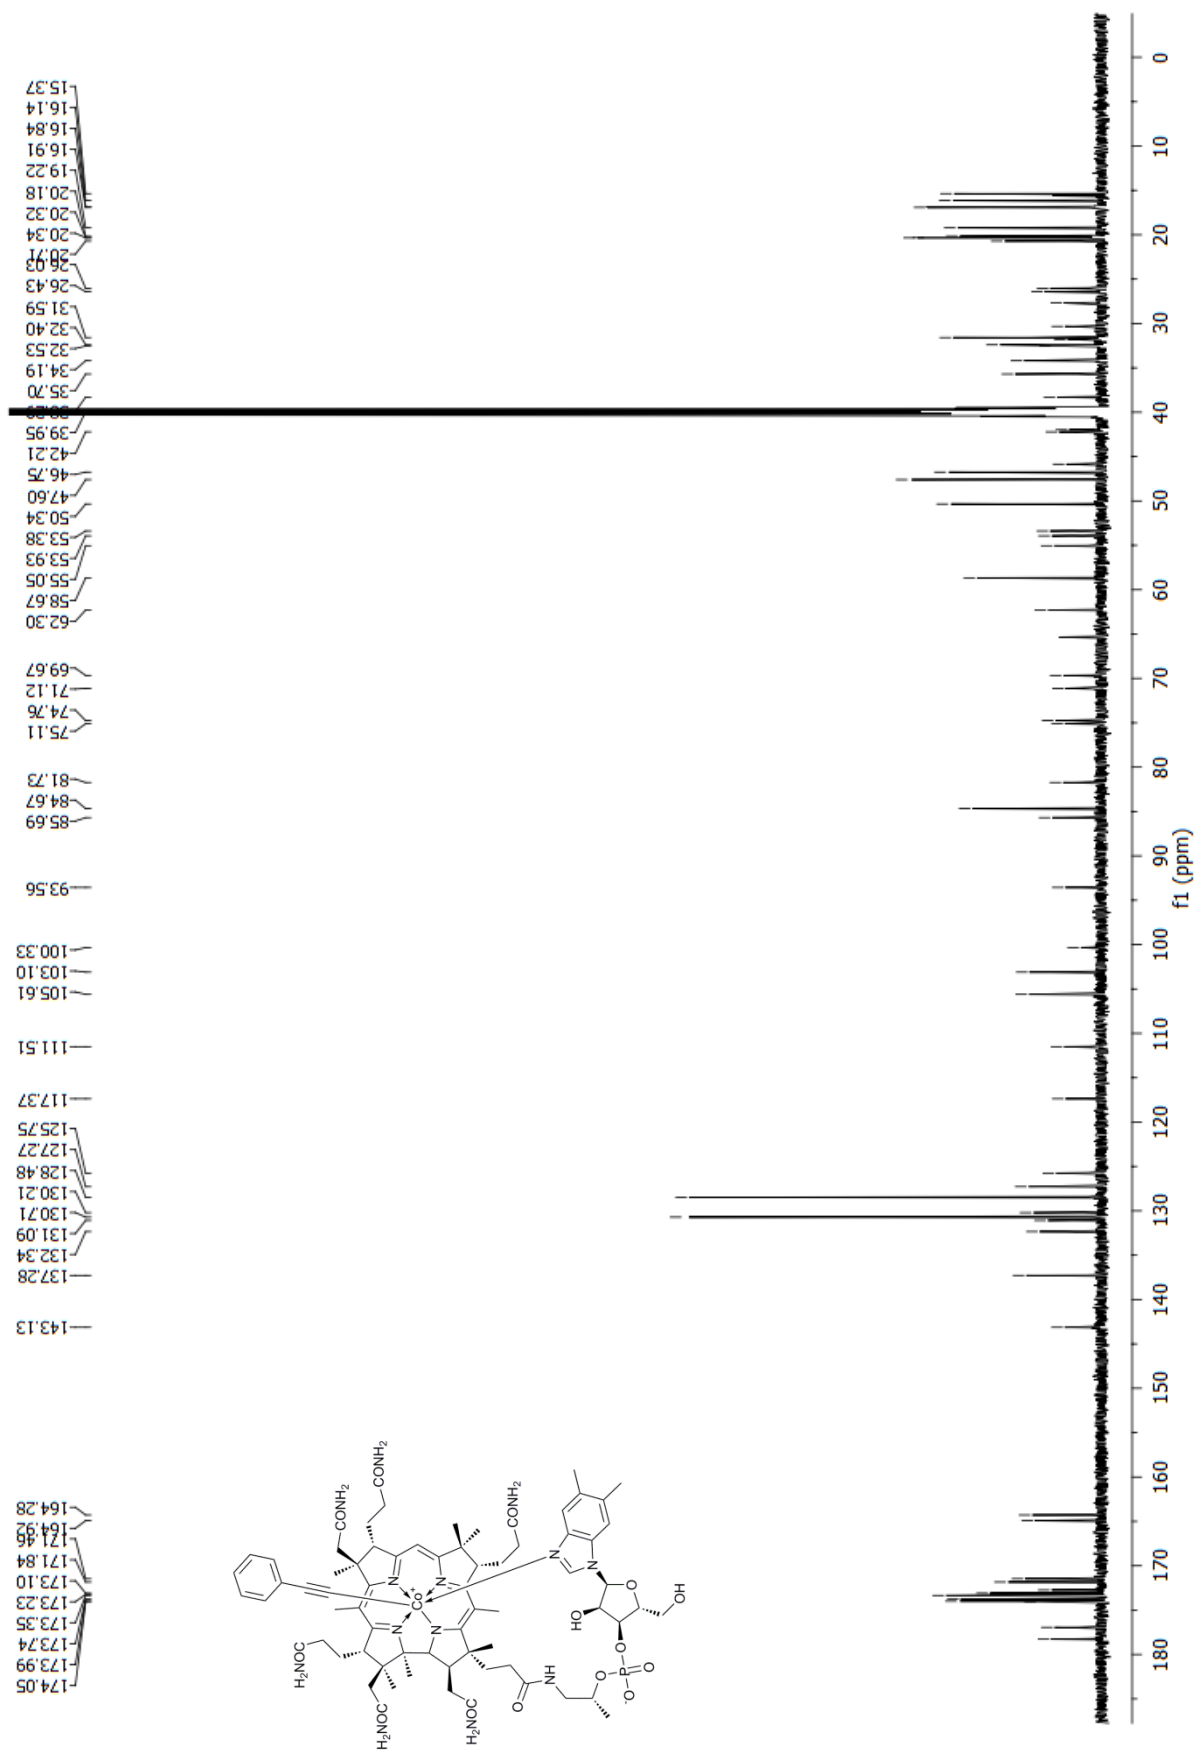

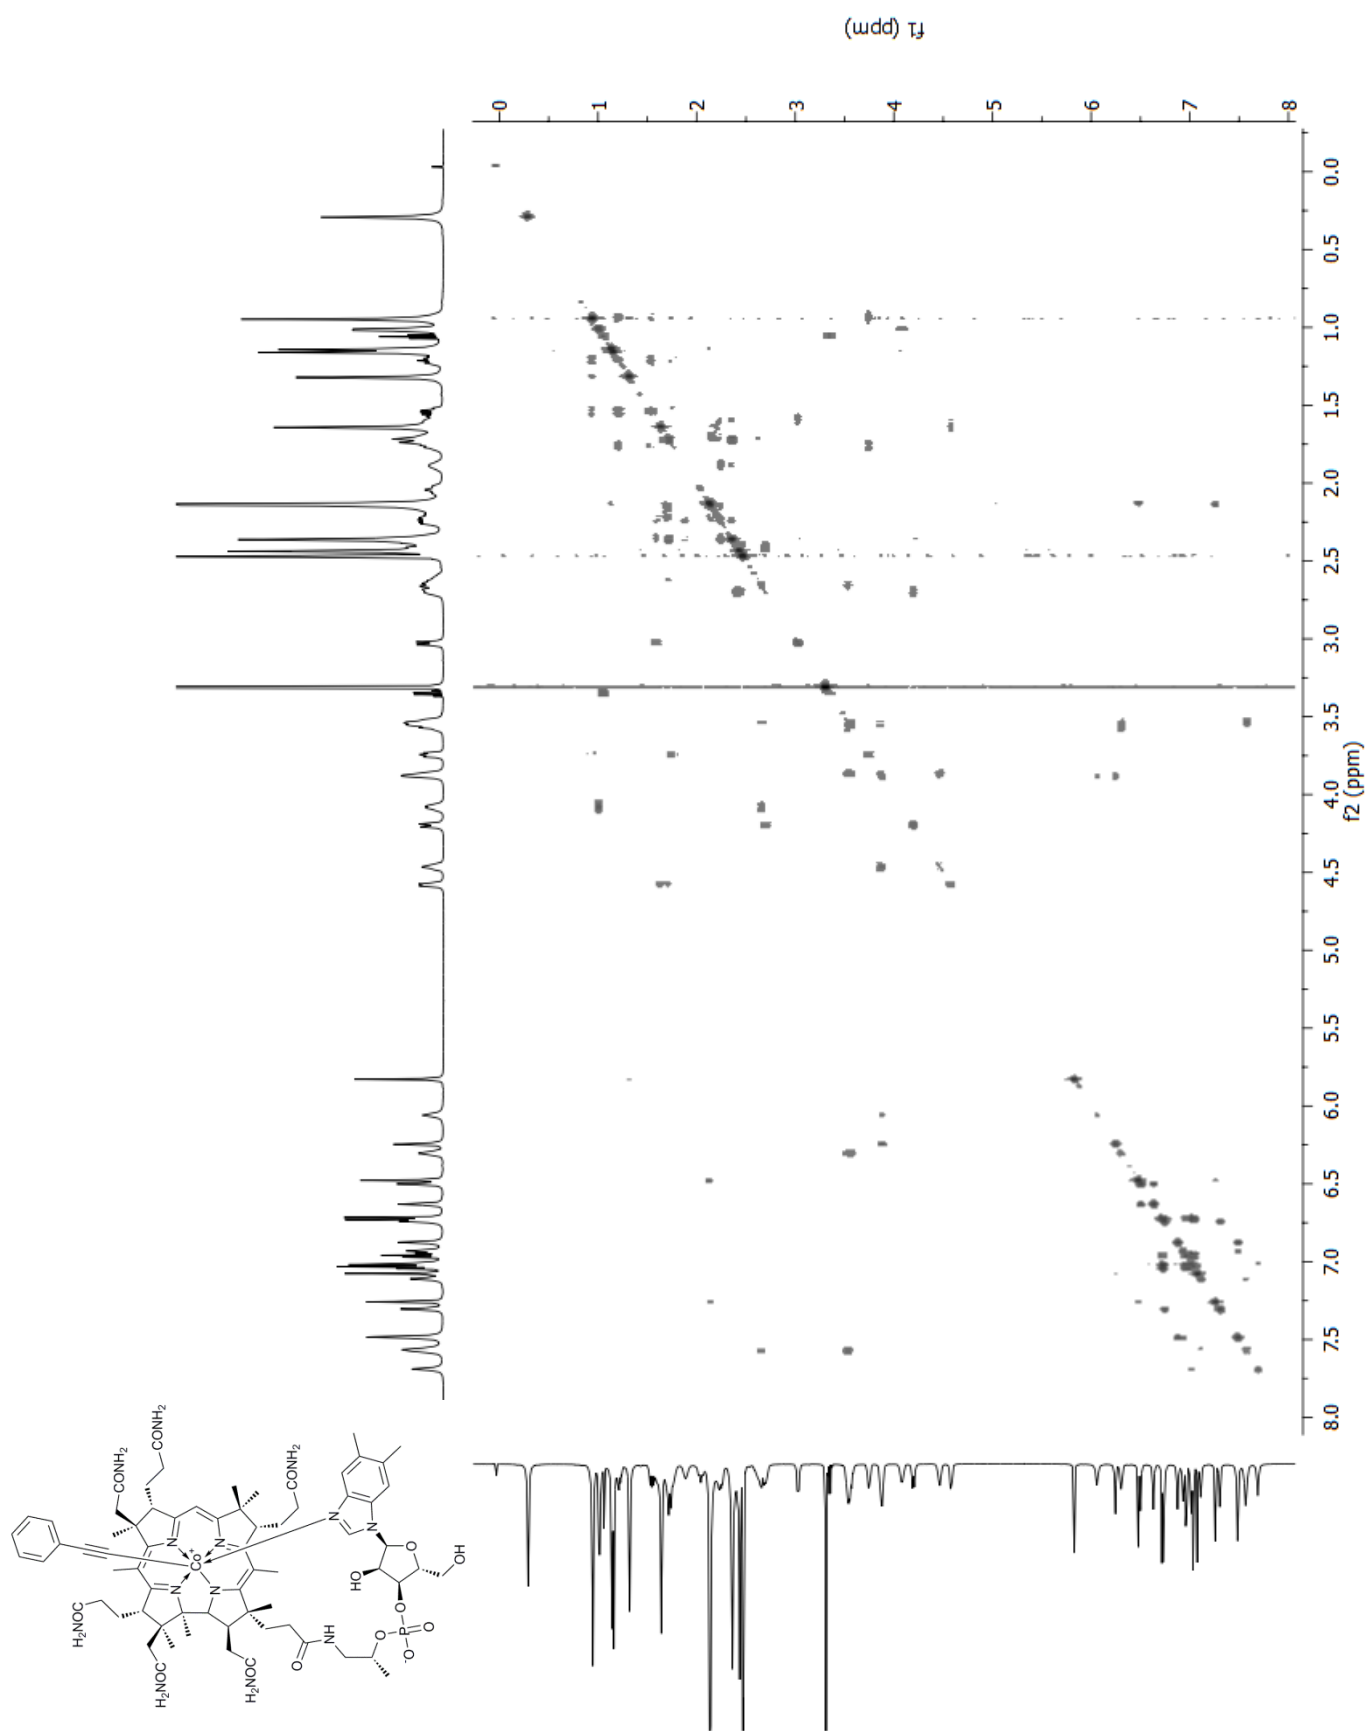

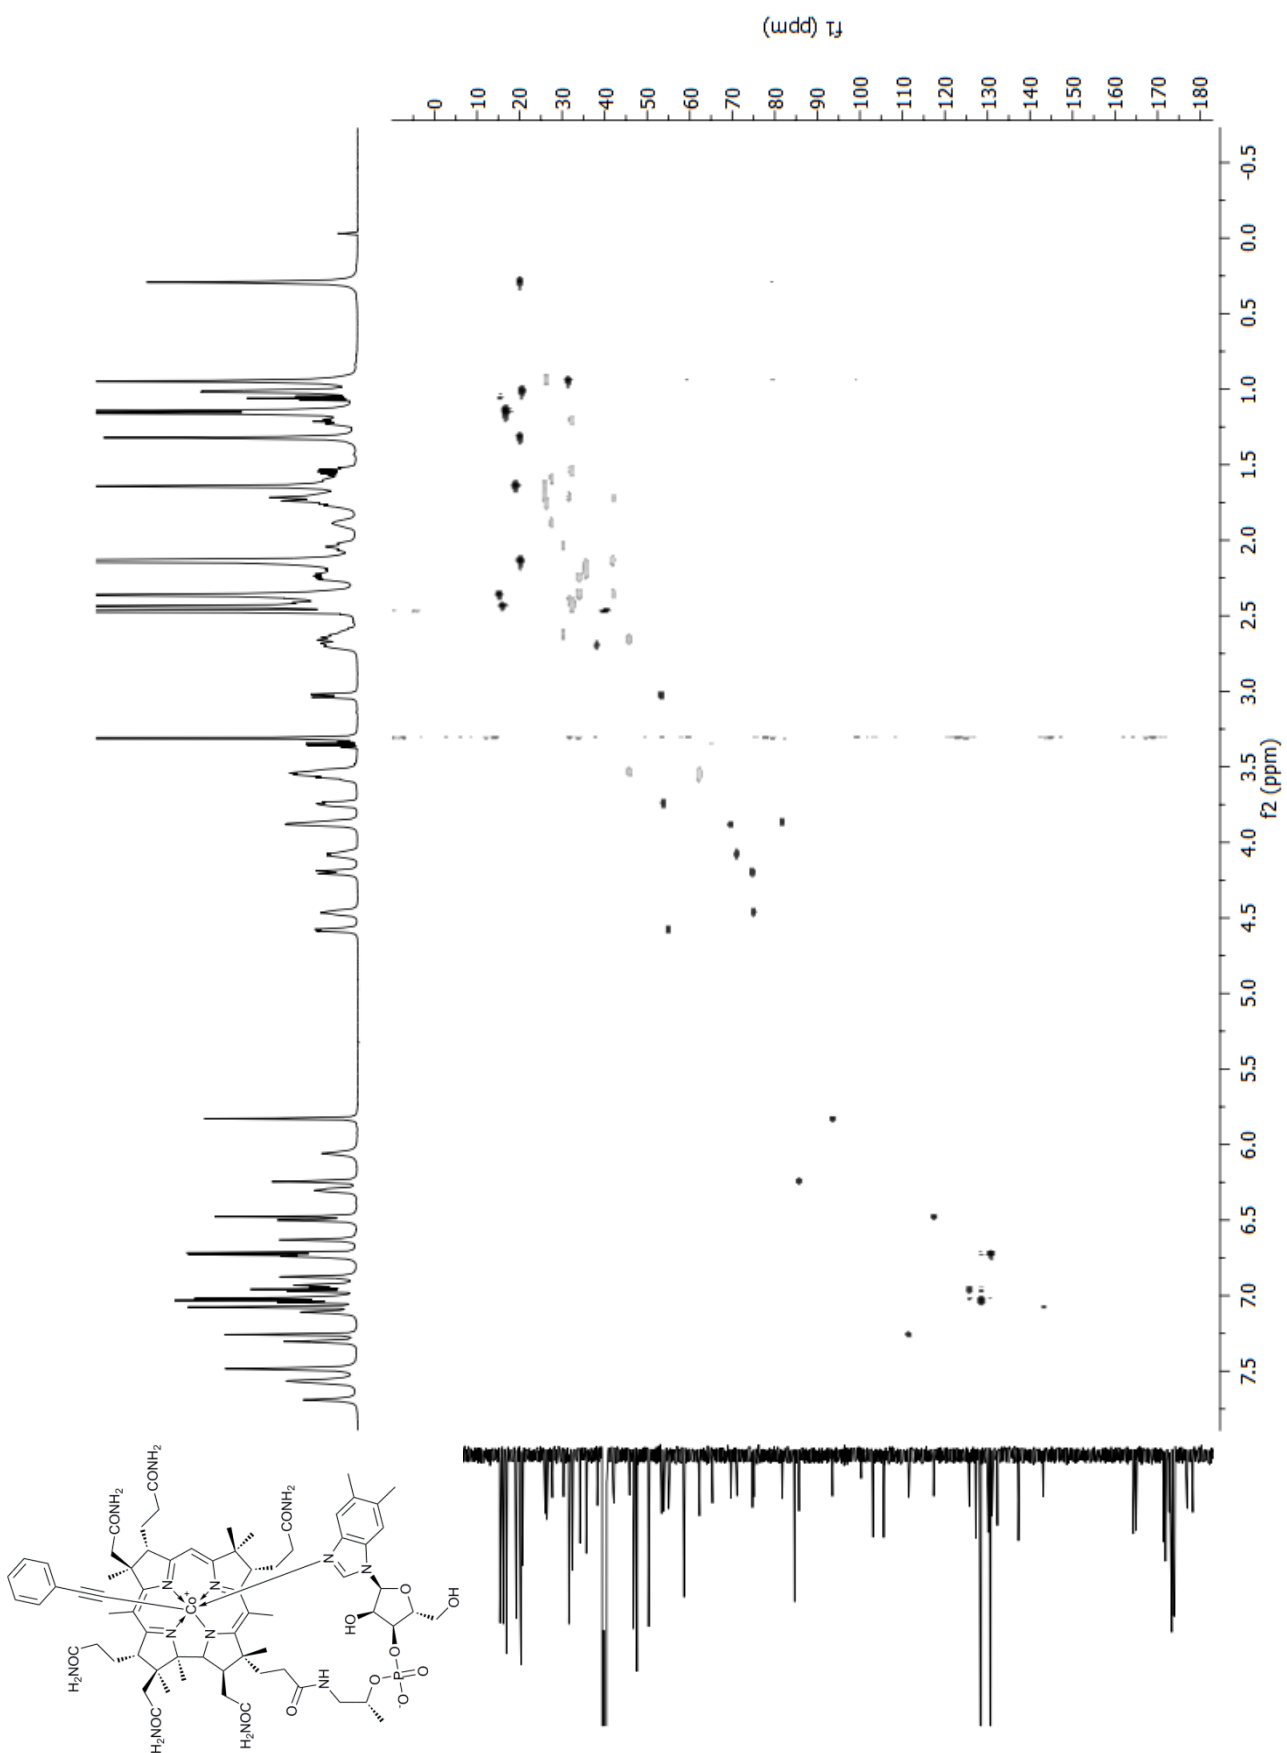

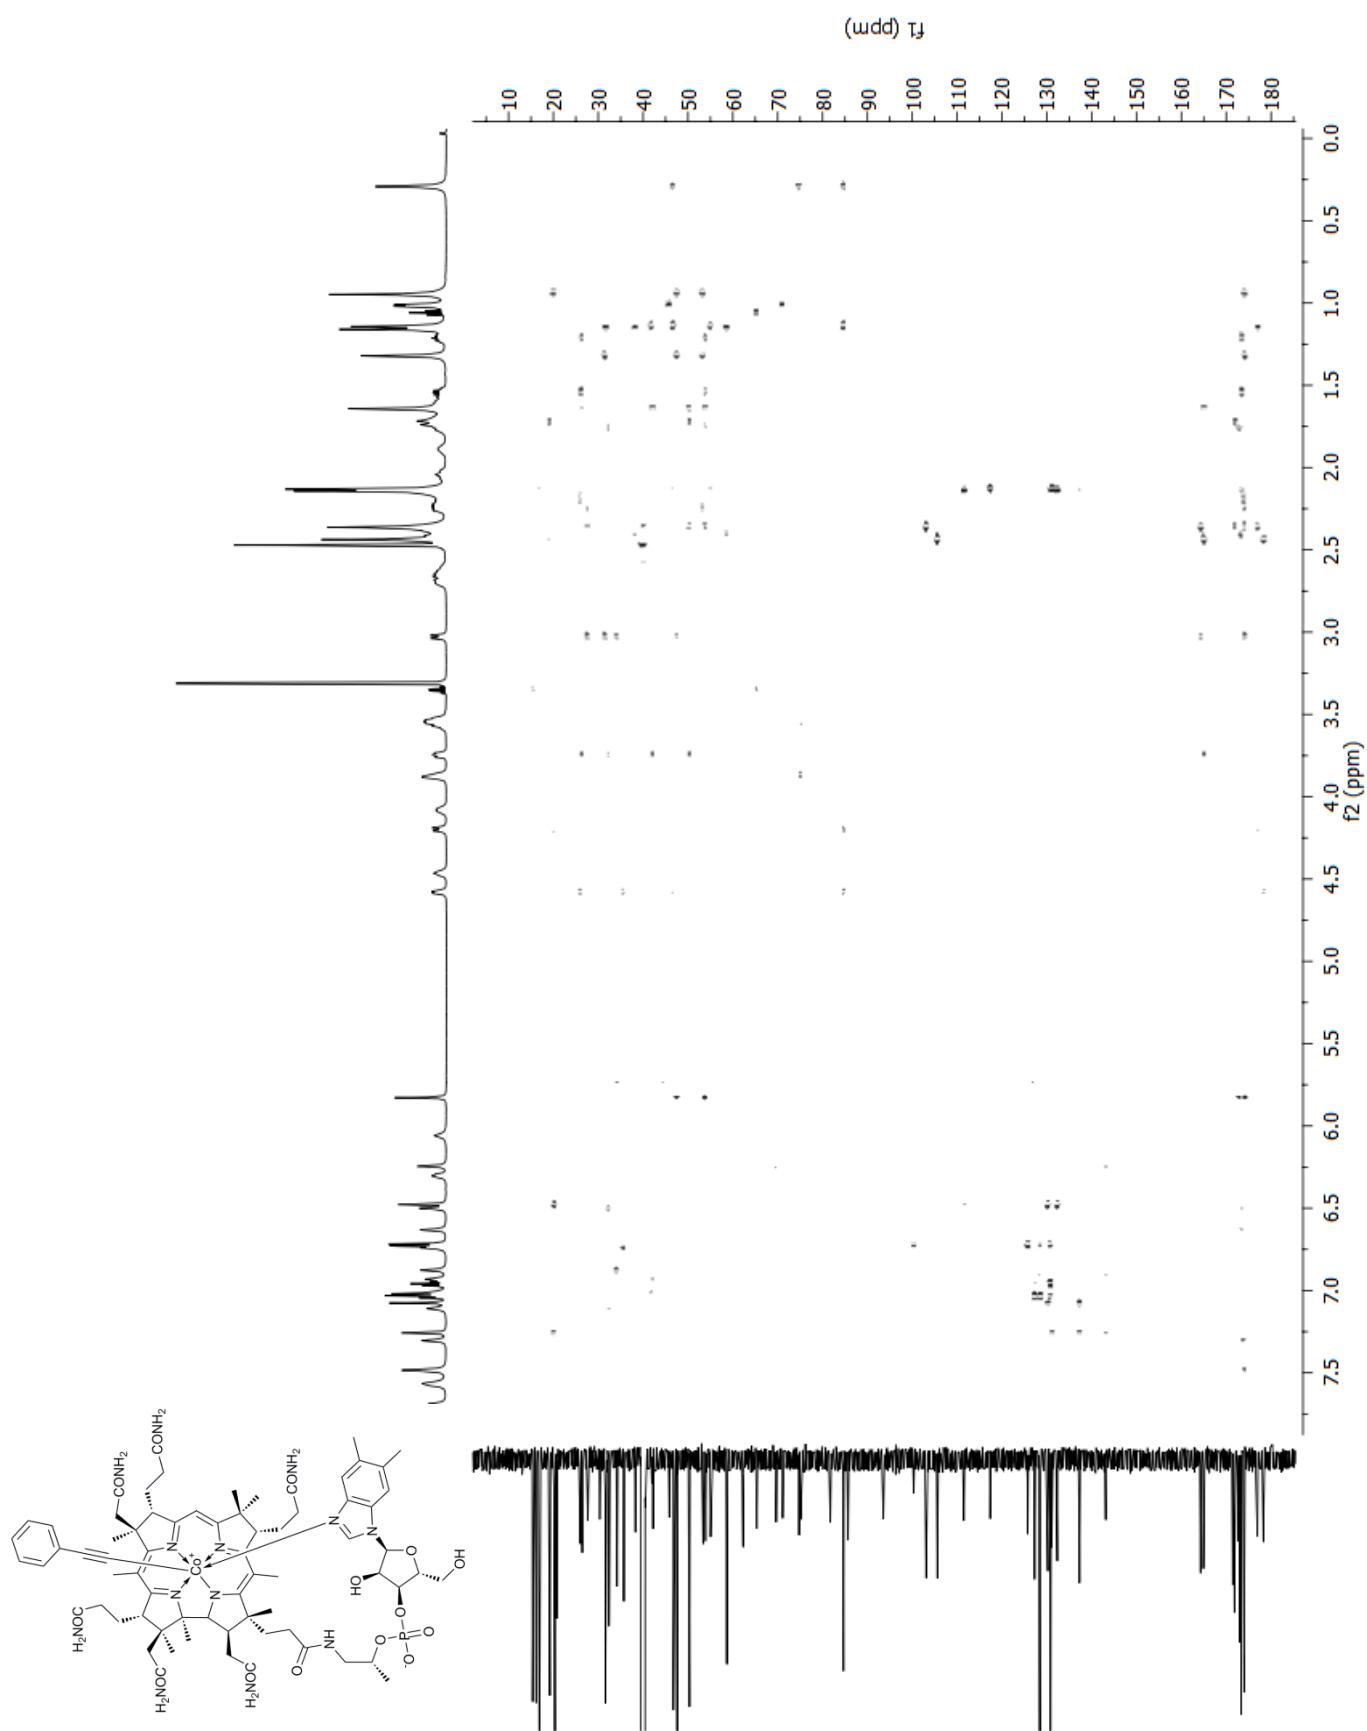

Copies of NMR spectra of compound **3**

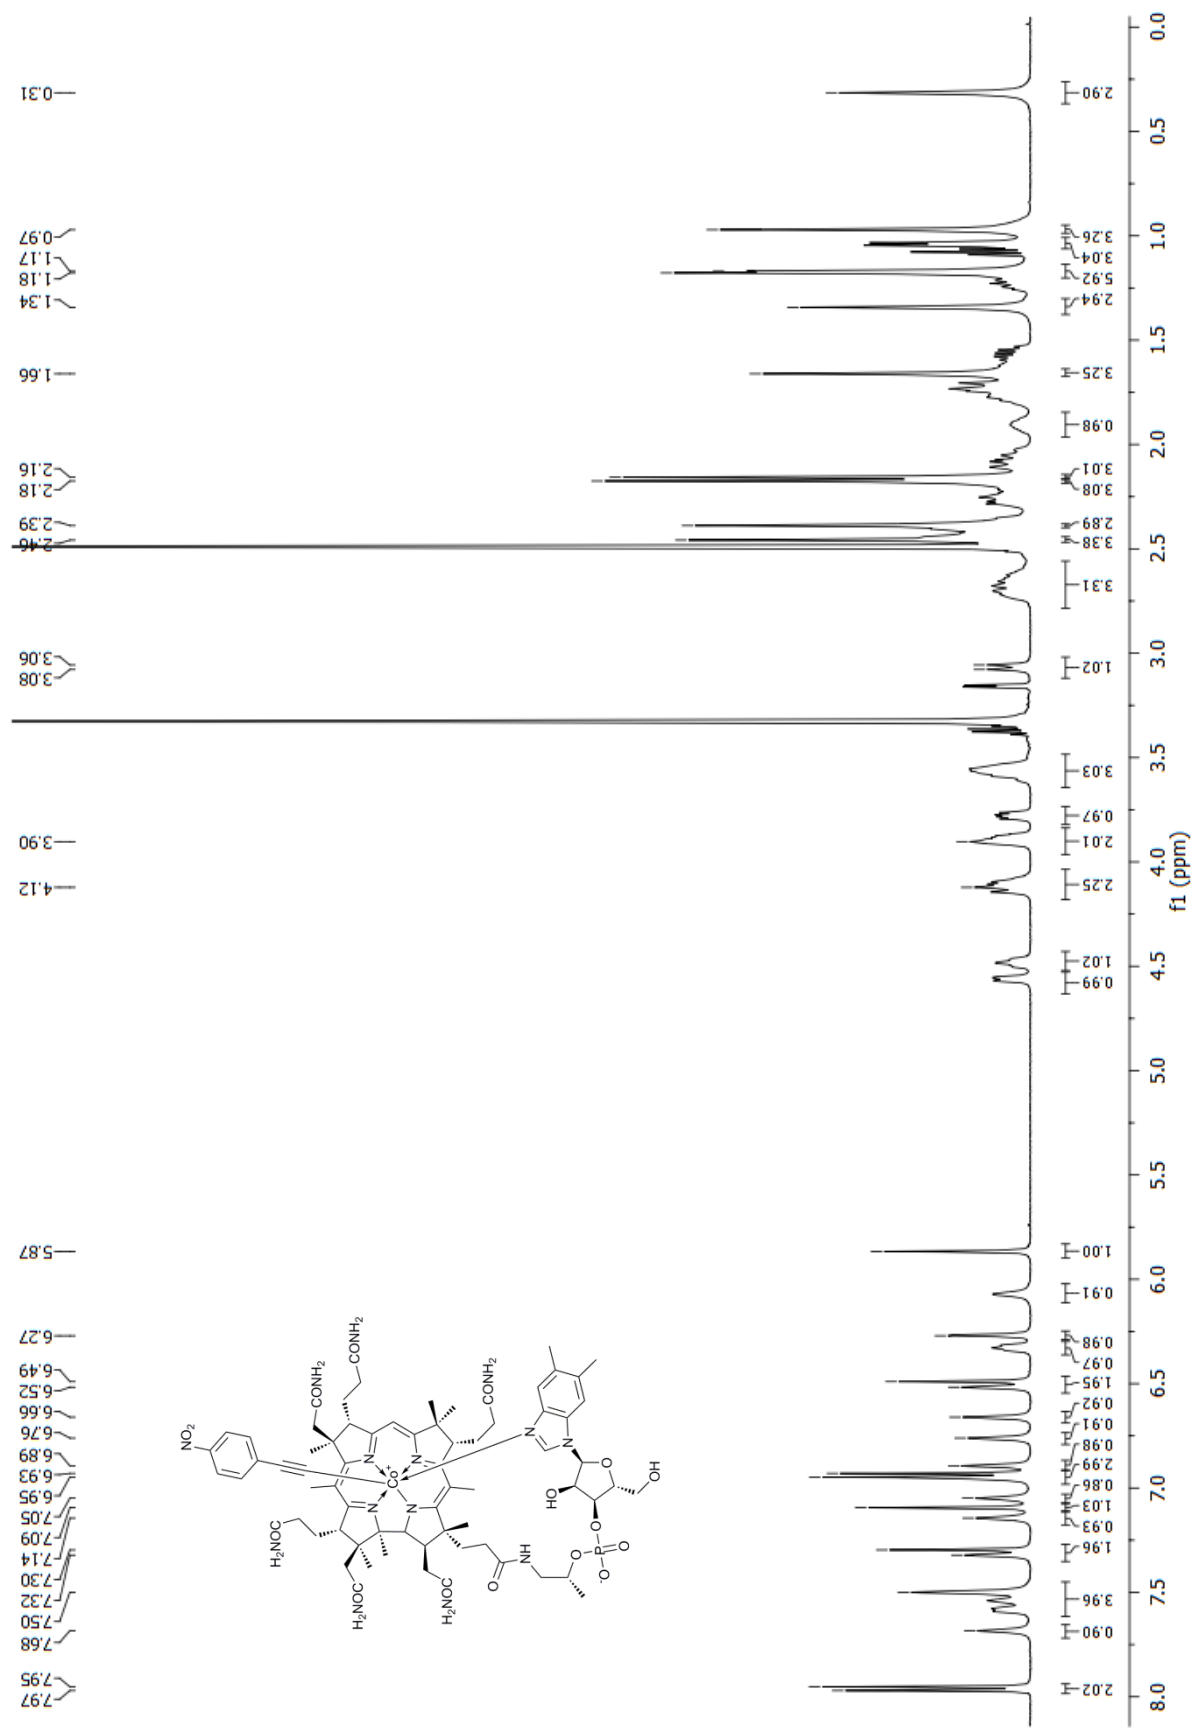

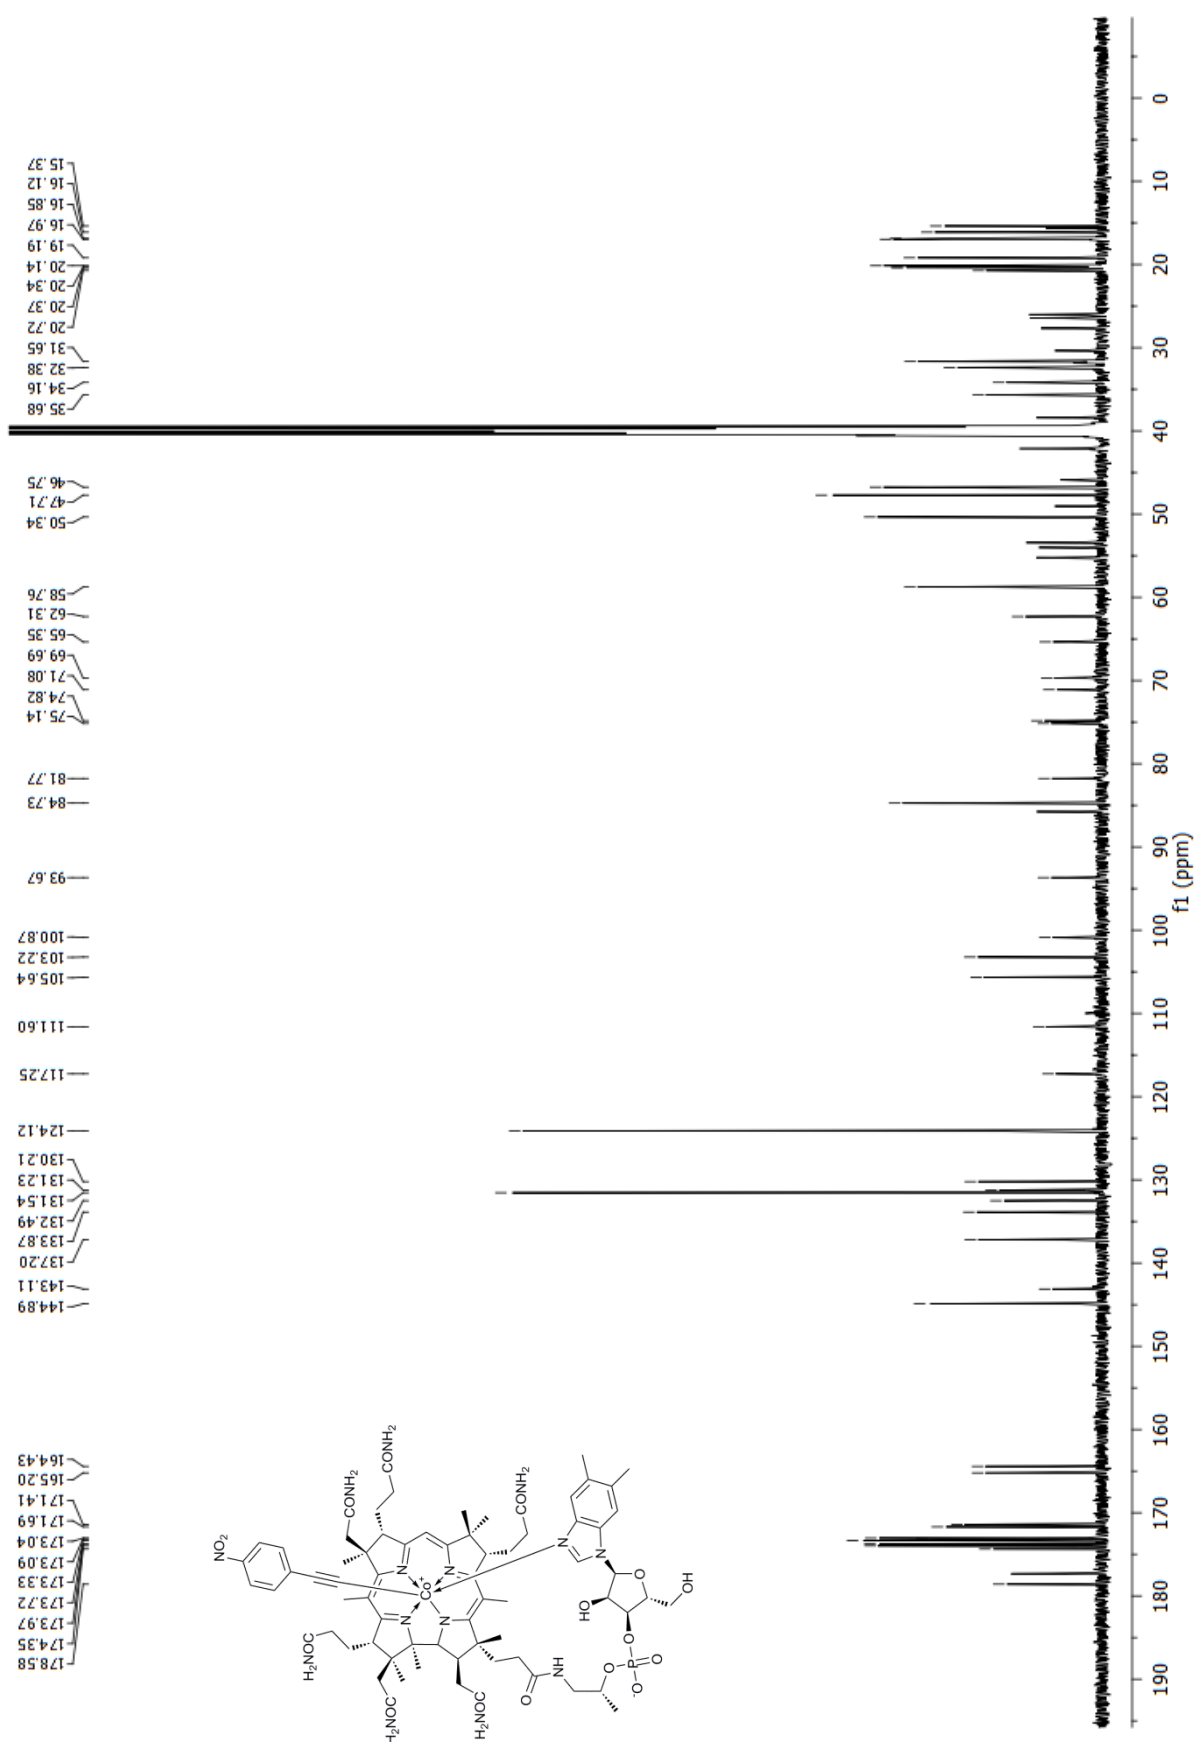

Copies of NMR spectra of compound **4**

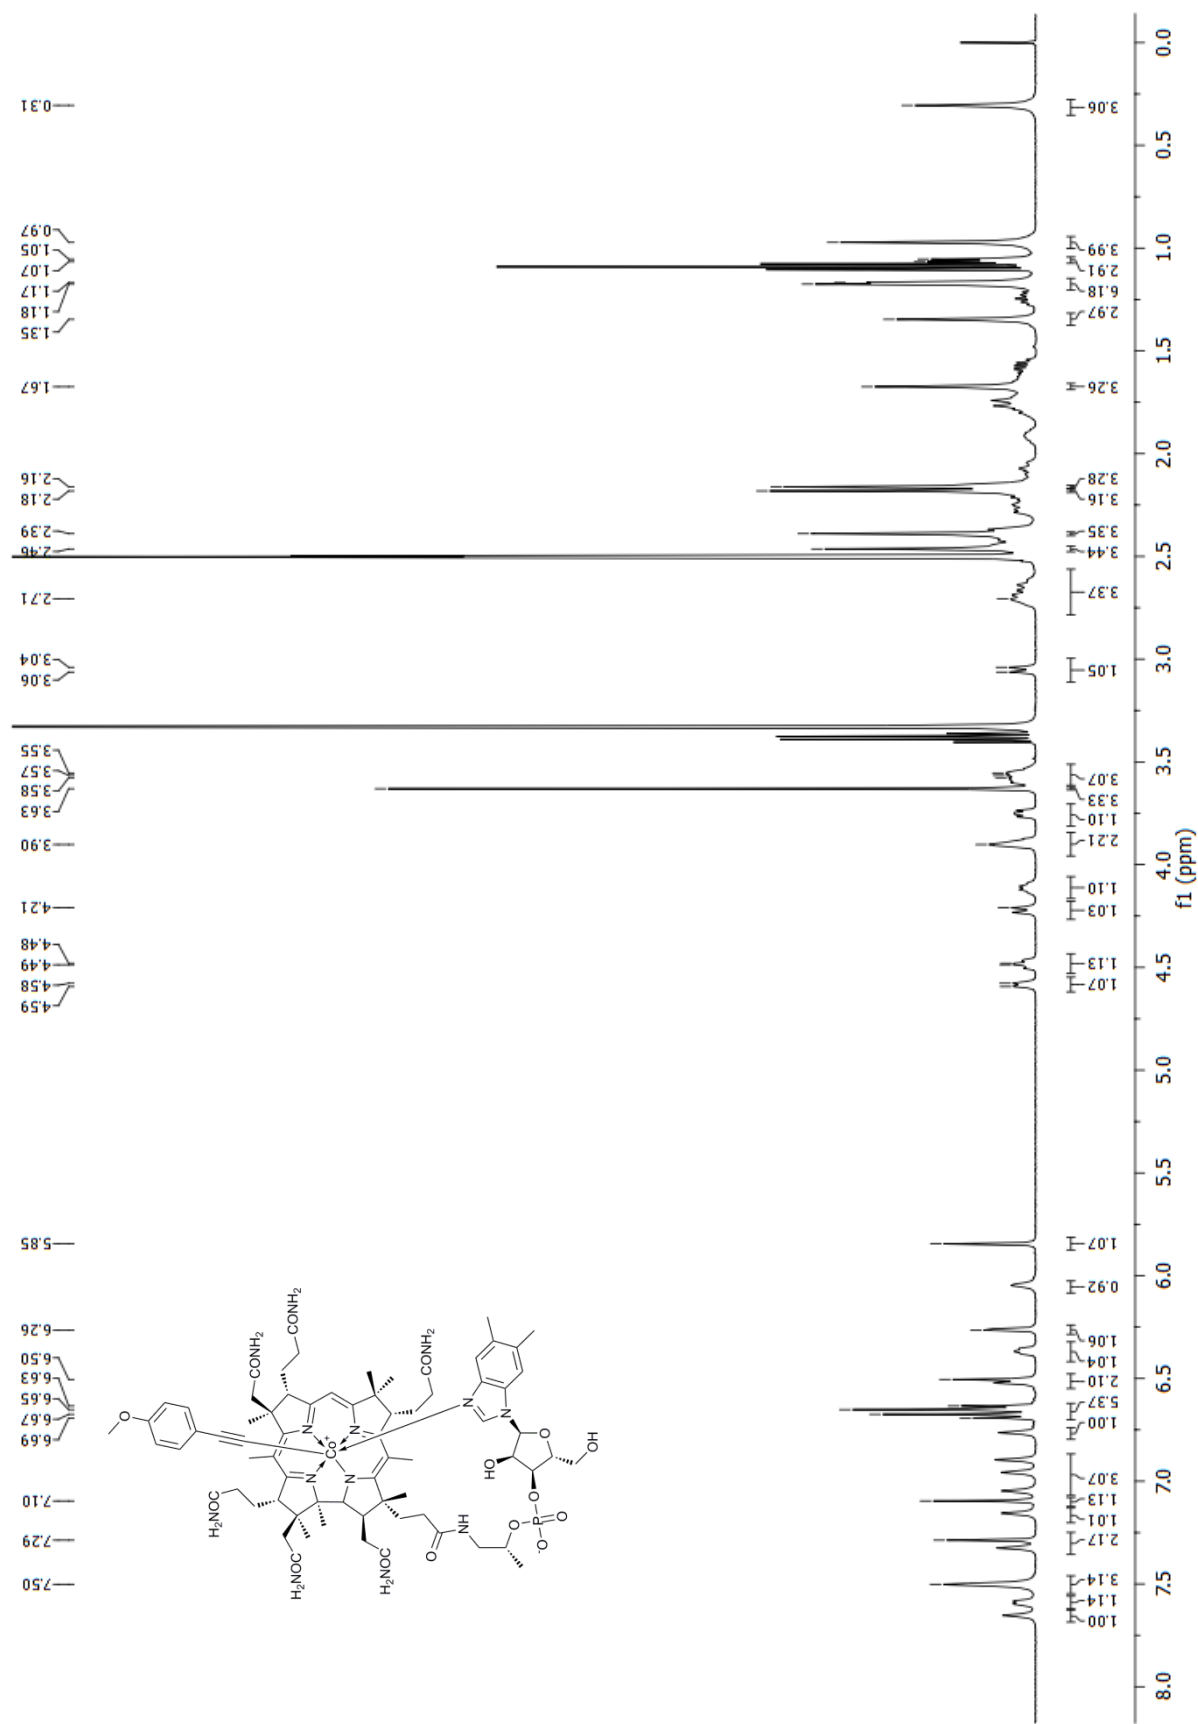



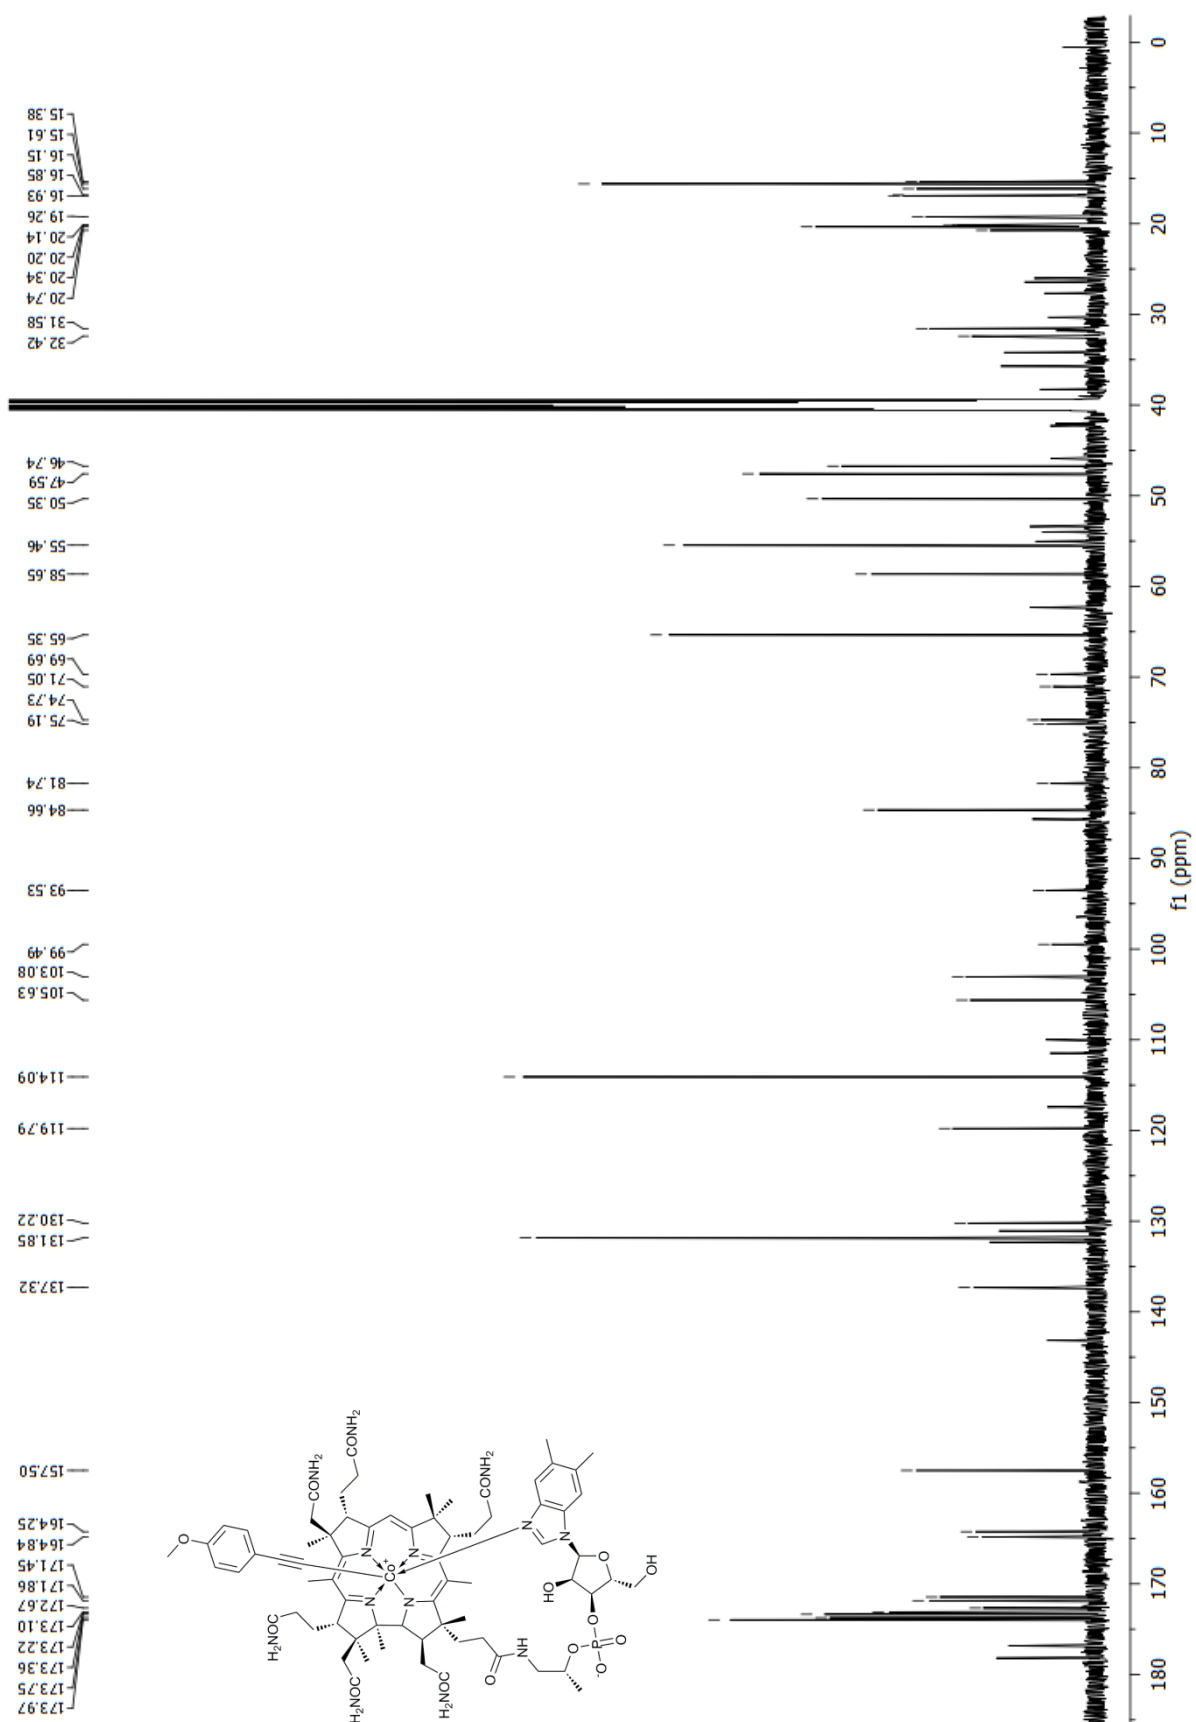

Copies of NMR spectra of compound **5**

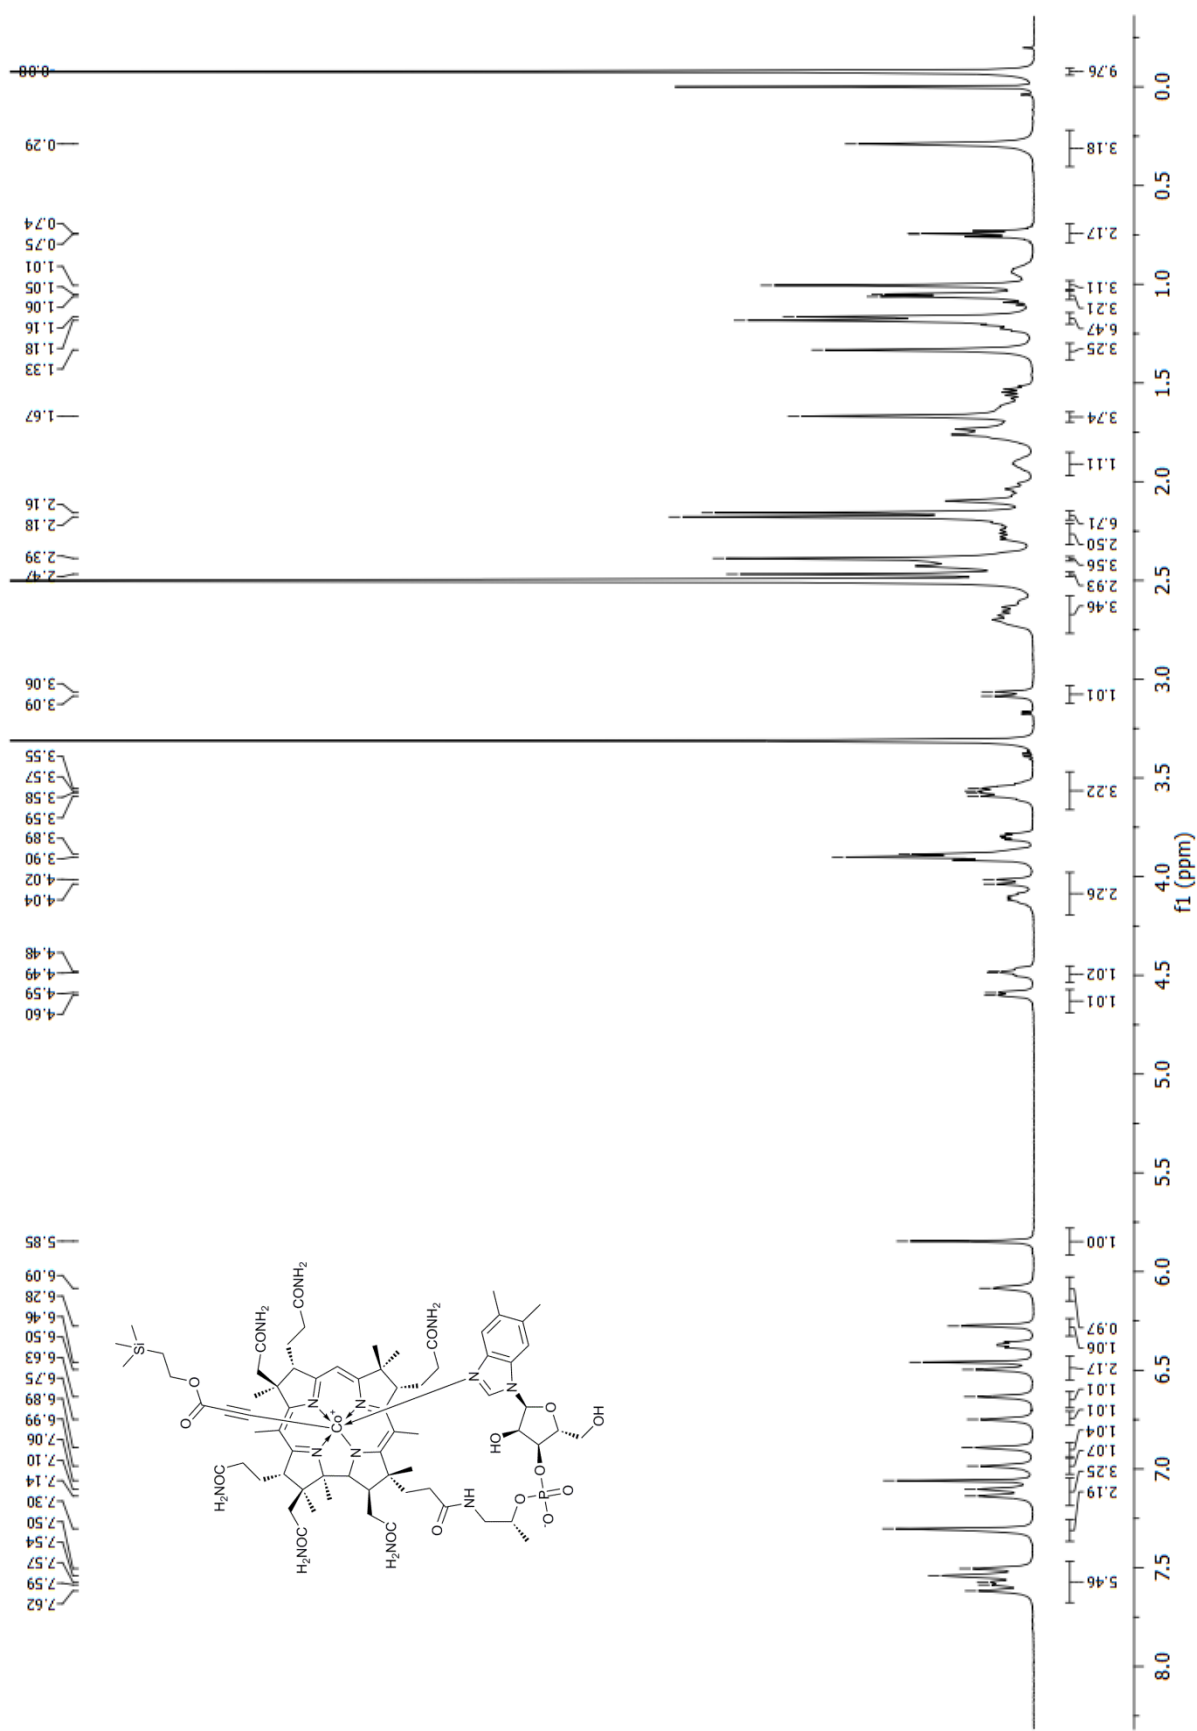

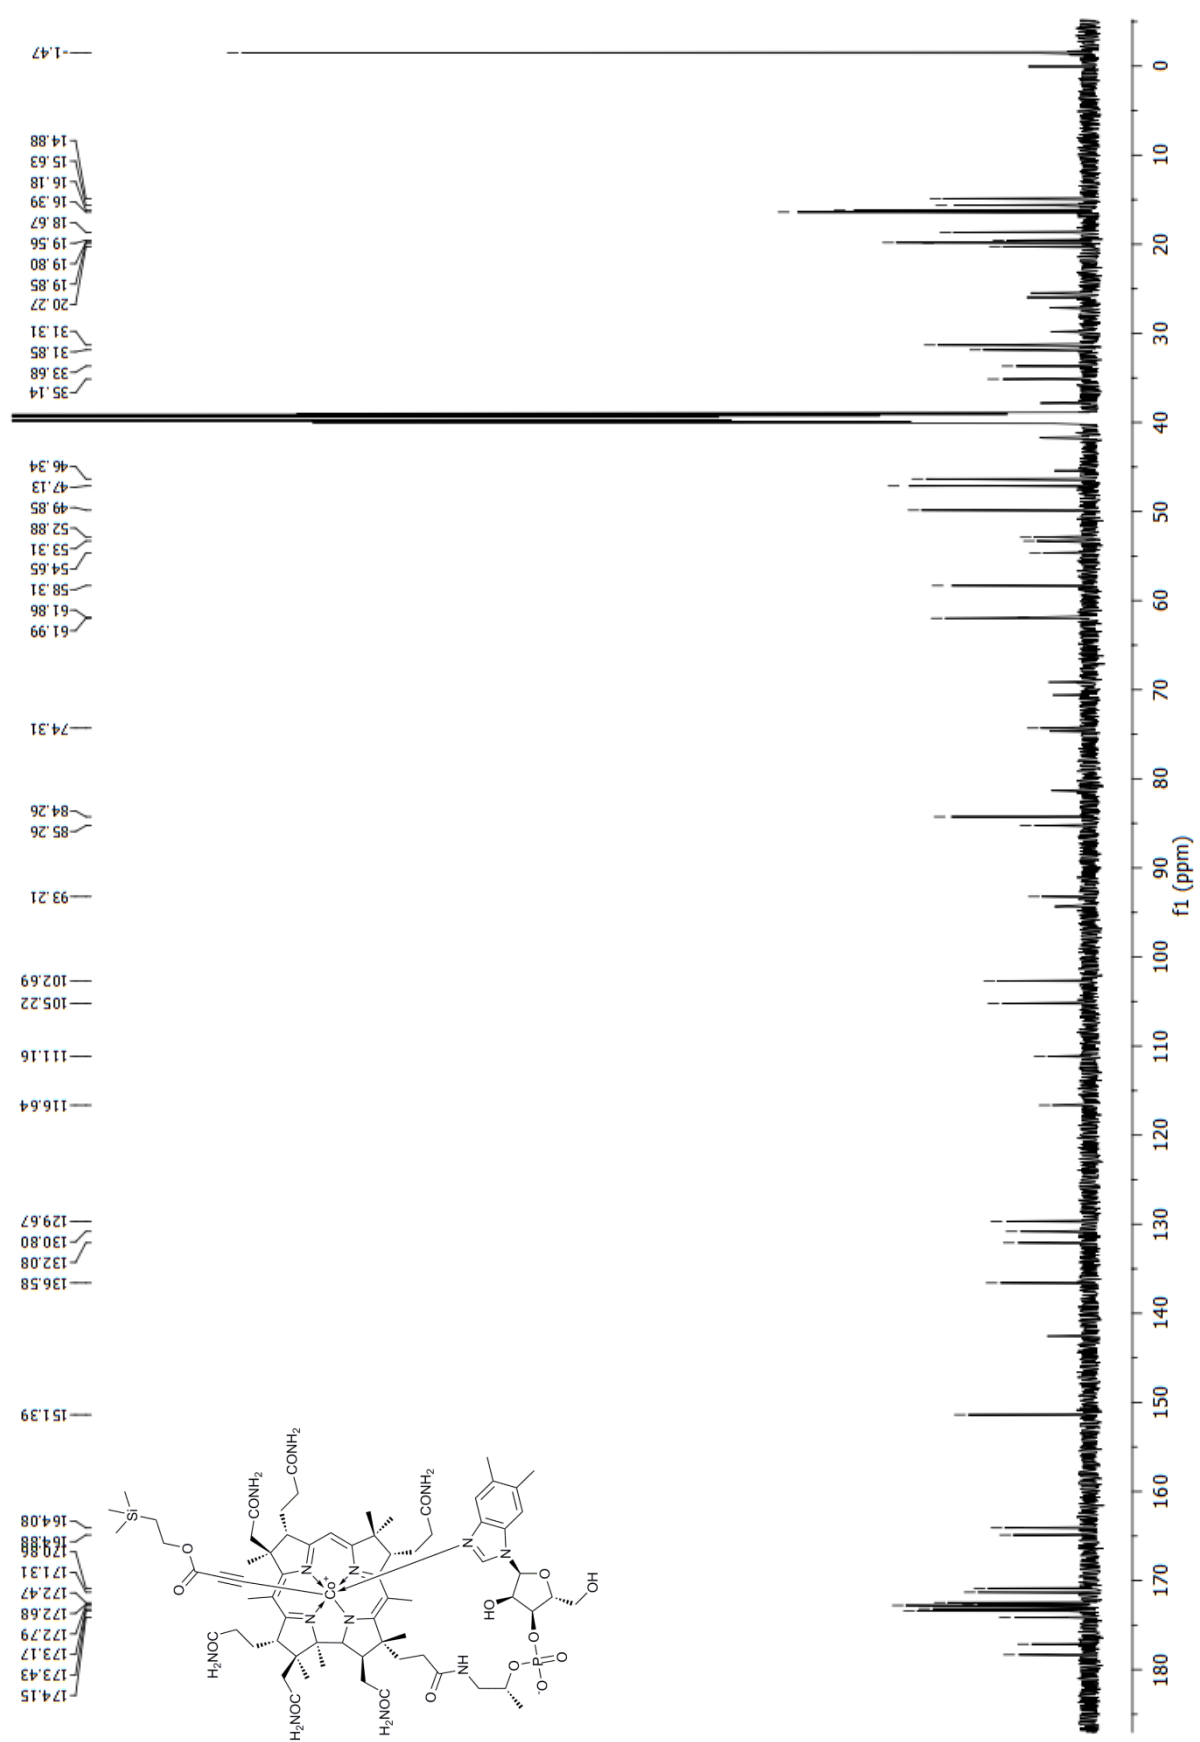

Copies of chromatograms of compounds **1-5**

Compound **1**

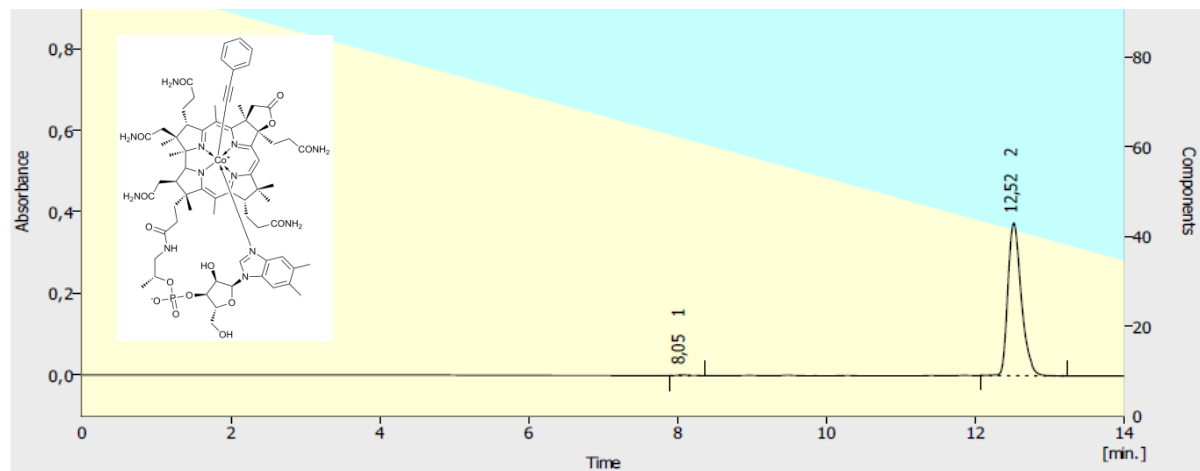

Result Table (Uncal - C:\Users\użytkownik\Desktop\mikołaj - chromatogramy\MIK 565\mik 565 po liofilizacji - S 2850: Channel 2)

|       | Reten. Time [min] | Area [mAU.s] | Height [mAU] | Area [%] | Height [%] | W05 [min] | Peak Purity [-] |
|-------|-------------------|--------------|--------------|----------|------------|-----------|-----------------|
| 1     | 8,050             | 18,256       | 1,899        | 0,4      | 0,5        | 0,17      | 739             |
| 2     | 12,517            | 4700,334     | 374,689      | 99,6     | 99,5       | 0,22      | 890             |
| Total |                   | 4718,590     | 376,587      | 100,0    | 100,0      |           |                 |

Compound **2**

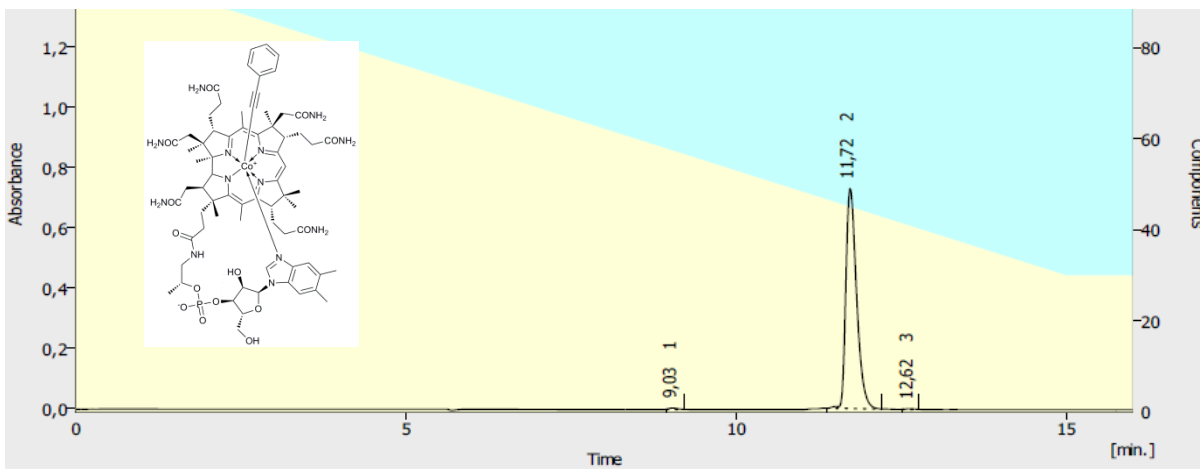

Result Table (Uncal - C:\Users\użytkownik\Desktop\Agnieszka Lewalska\hplc\hplc ładne\AL 6'19-lip-2013 AL 6' Ph - S 2850: Channel 2)

|       | Reten. Time [min] | Area [mAU.s] | Height [mAU] | Area [%] | Height [%] | W05 [min] | Peak Purity [-] |
|-------|-------------------|--------------|--------------|----------|------------|-----------|-----------------|
| 1     | 9,033             | 36,926       | 4,500        | 0,4      | 0,6        | 0,15      | 993             |
| 2     | 11,717            | 8201,345     | 730,168      | 99,3     | 99,1       | 0,18      | 893             |
| 3     | 12,617            | 19,743       | 2,270        | 0,2      | 0,3        | 0,17      | 999             |
| Total |                   | 8258,015     | 736,938      | 100,0    | 100,0      |           |                 |

Compound 3

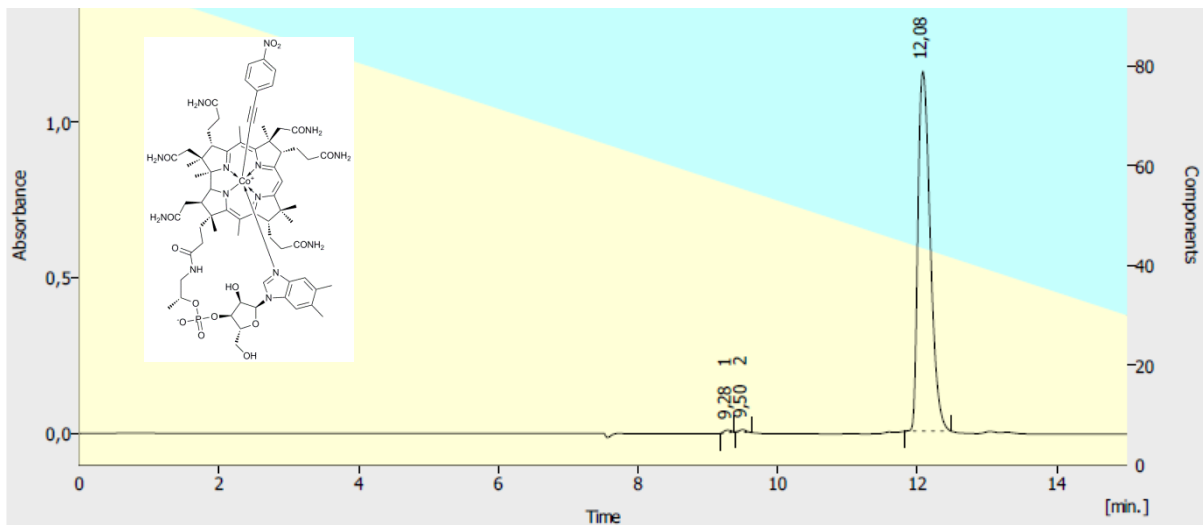

Result Table (Uncal - C:\Users\użytkownik\Desktop\Agnieszka Lewalska\hplc\hplc ładne\MIK 556 4-NO219-lip-2013  
MIK 556 4-NO2 - S 2850: Channel 2)

|       | Reten. Time<br>[min] | Area<br>[mAU.s] | Height<br>[mAU] | Area<br>[%] | Height<br>[%] | W05<br>[min] | Peak Purity<br>[-] |
|-------|----------------------|-----------------|-----------------|-------------|---------------|--------------|--------------------|
| 1     | 9,283                | 55,683          | 8,509           | 0,4         | 0,7           | 0,15         | 989                |
| 2     | 9,500                | 54,968          | 8,333           | 0,4         | 0,7           | 0,13         | 997                |
| 3     | 12,083               | 14088,805       | 1154,510        | 99,2        | 98,6          | 0,20         | 919                |
| Total |                      | 14199,475       | 1171,352        | 100,0       | 100,0         |              |                    |

Compound 4

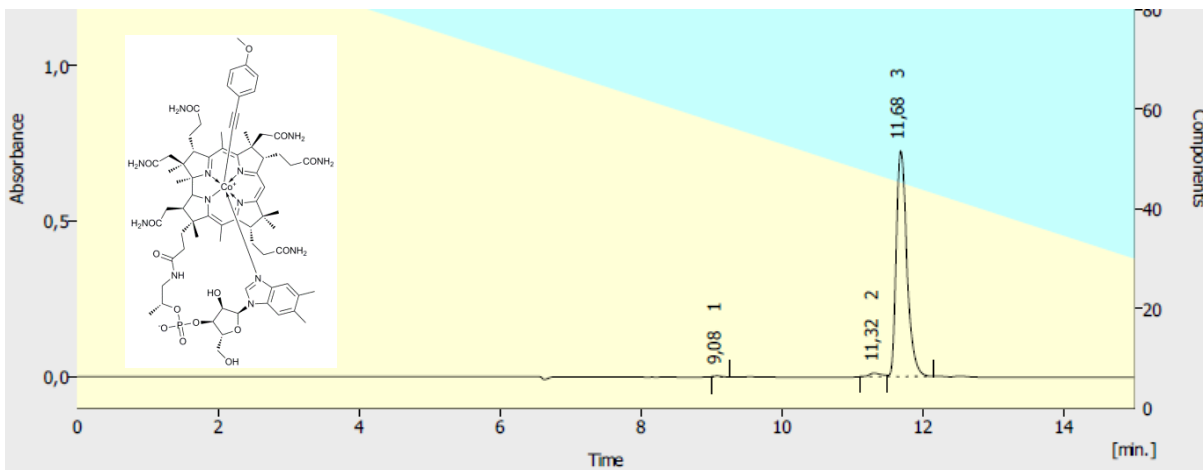

Result Table (Uncal - C:\Users\użytkownik\Desktop\Agnieszka Lewalska\hplc\hplc ładne\AL 557 4-OMe19-lip-2013  
AL 557 4-OMe - S 2850: Channel 2)

|       | Reten. Time<br>[min] | Area<br>[mAU.s] | Height<br>[mAU] | Area<br>[%] | Height<br>[%] | W05<br>[min] | Peak Purity<br>[-] |
|-------|----------------------|-----------------|-----------------|-------------|---------------|--------------|--------------------|
| 1     | 9,083                | 21,959          | 2,851           | 0,3         | 0,4           | 0,13         | 982                |
| 2     | 11,317               | 129,873         | 11,265          | 1,7         | 1,5           | 0,22         | 994                |
| 3     | 11,683               | 7626,036        | 724,173         | 98,0        | 98,1          | 0,17         | 889                |
| Total |                      | 7777,868        | 738,288         | 100,0       | 100,0         |              |                    |

Compound 5

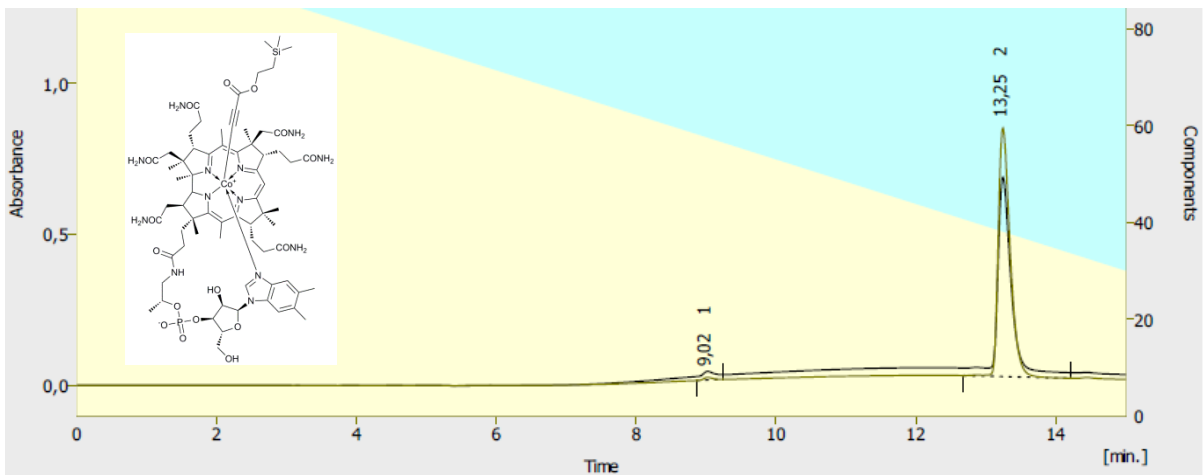

Result Table (Uncal - C:\USERS\UŻYTKOWNIK\DESKTOP\AGNIESZKA LEWALSKA\HPLC\AL60\AL60 PO 2  
KOLUMNIE08\_3013-SIE-2013 - S 2850: Channel 1)

|       | Reten. Time<br>[min] | Area<br>[mAU.s] | Height<br>[mAU] | Area<br>[%] | Height<br>[%] | W05<br>[min] | Peak Purity<br>[-] |
|-------|----------------------|-----------------|-----------------|-------------|---------------|--------------|--------------------|
| 1     | 9,017                | 75,049          | 8,732           | 0,8         | 1,0           | 0,15         | 997                |
| 2     | 13,250               | 9692,535        | 823,263         | 99,2        | 99,0          | 0,20         | 937                |
| Total |                      | 9767,585        | 831,995         | 100,0       | 100,0         |              |                    |

Stability tests

Thermostability:

Samples of ~ 2 mg of compounds **2**, **3** and **4**, were dissolved in of phosphate buffer (pH = 7, 0.5 ml) and transferred into a tube equipped with RotaFlo screw cap. Tubes were placed in the preheated oil bath (100 °C) for 24h. Then mixtures were cooled down to room temperature and samples were analyzed using HPLC. For compound **4** the first analysis was performed after 2 h of heating, showing a high degree of decomposition.

HPLC chromatogram of **2** after 24 h of heating at 100 °C

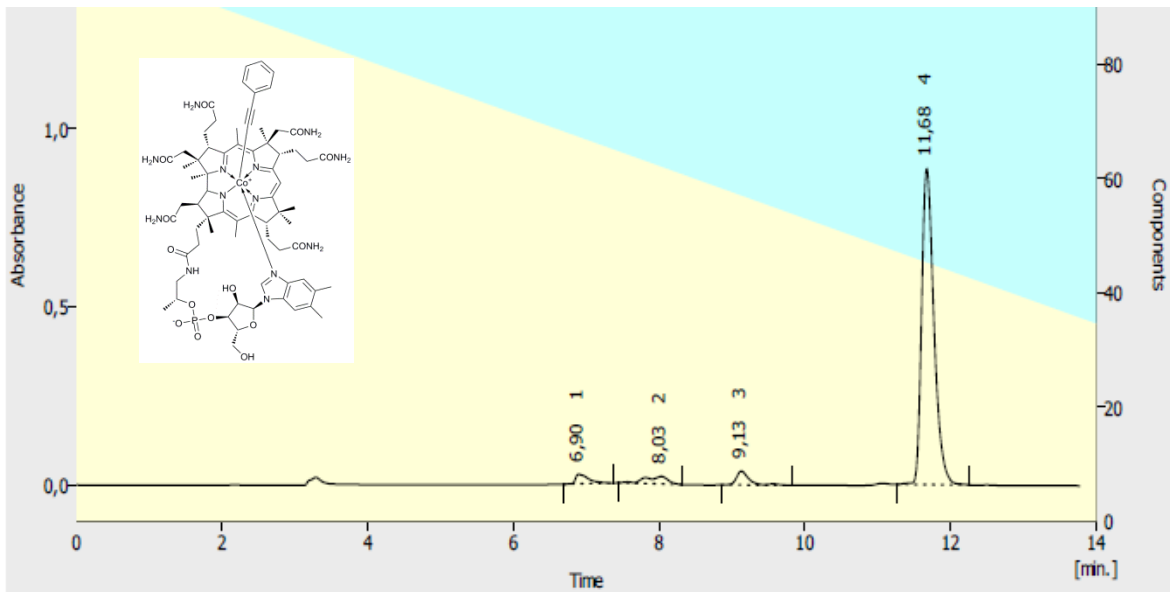

Result Table (Uncal - C:\Users\uzzytkownik\Desktop\mikolej - chromatogramy\thermo - stability\thermo stability - wrzesien\Ph, 20h @ 10007\_1916-wrz-2013 - S 2850: Channel 2)

|       | Reten. Time<br>[min] | Area<br>[mAU.s] | Height<br>[mAU] | Area<br>[%] | Height<br>[%] | W05<br>[min] | Peak Purity<br>[-] |
|-------|----------------------|-----------------|-----------------|-------------|---------------|--------------|--------------------|
| 1     | 6,900                | 328,998         | 26,989          | 2,8         | 2,8           | 0,20         | 969                |
| 2     | 8,033                | 461,194         | 21,437          | 4,0         | 2,2           | 0,40         | 993                |
| 3     | 9,133                | 461,251         | 38,666          | 4,0         | 4,0           | 0,18         | 979                |
| 4     | 11,683               | 10388,656       | 885,515         | 89,2        | 91,0          | 0,18         | 838                |
| Total |                      | 11640,096       | 972,606         | 100,0       | 100,0         |              |                    |

HPLC chromatogram of **3** after 24 h of heating at 100 °C

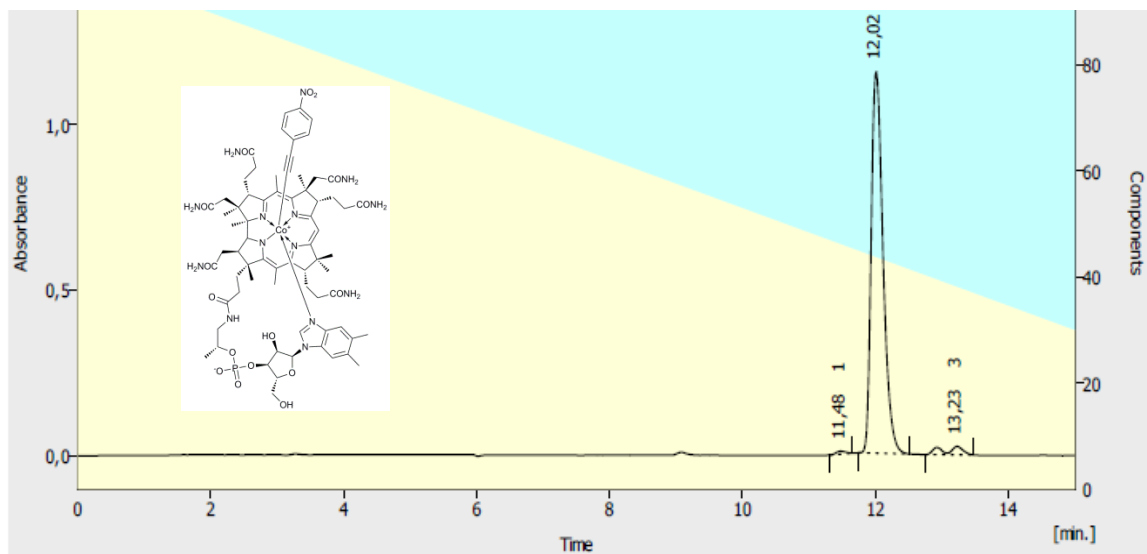

Result Table (Uncal - C:\Users\uzytkownik\Desktop\mikolaj - chromatogramy\thermo - stability\thermo stability - wrzesien\4-NO216\_5215-wrz-2013 - S 2850: Channel 2)

|       | Reten. Time [min] | Area [mAU.s] | Height [mAU] | Area [%] | Height [%] | W05 [min] | Peak Purity [-] |
|-------|-------------------|--------------|--------------|----------|------------|-----------|-----------------|
| 1     | 11,483            | 84,288       | 8,976        | 0,6      | 0,8        | 0,20      | 851             |
| 2     | 12,017            | 14193,265    | 1150,636     | 96,0     | 97,1       | 0,22      | 892             |
| 3     | 13,233            | 511,422      | 25,570       | 3,5      | 2,2        | 0,18      | 872             |
| Total |                   | 14788,976    | 1185,182     | 100,0    | 100,0      |           |                 |

HPLC chromatogram of **4** after 2 h of heating at 100 °C

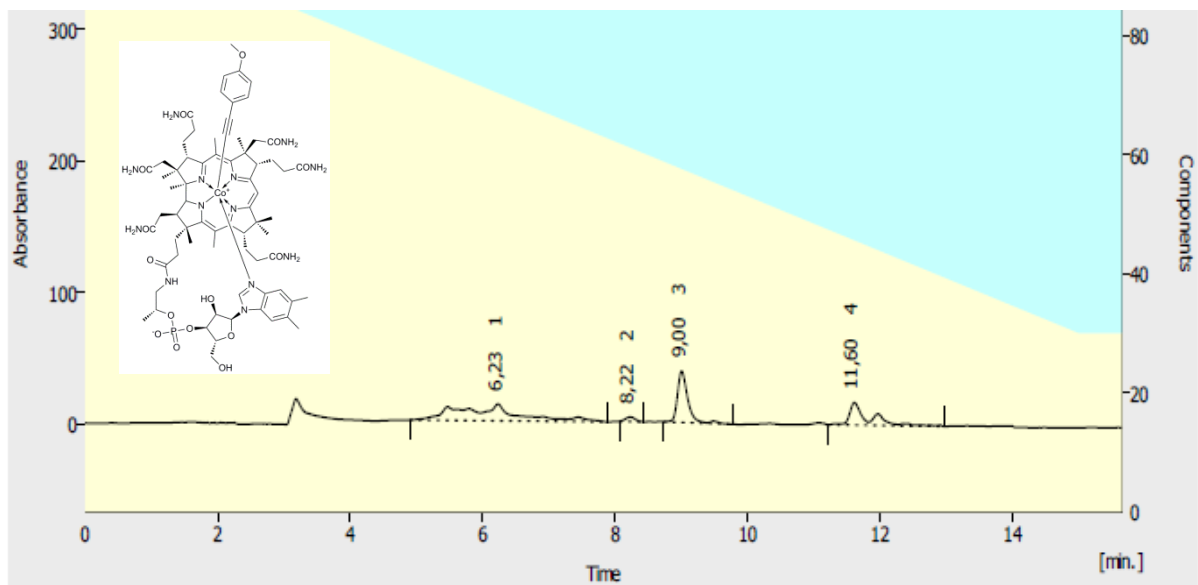

Result Table (Uncal - C:\Users\uzytkownik\Desktop\mikolaj - chromatogramy\thermo - stability\thermo stability - wrzesien\4-OMe, 20h @ 10006\_5216-wrz-2013 - S 2850: Channel 2)

|       | Reten. Time [min] | Area [mAU.s] | Height [mAU] | Area [%] | Height [%] | W05 [min] | Peak Purity [-] |
|-------|-------------------|--------------|--------------|----------|------------|-----------|-----------------|
| 1     | 6,233             | 773,325      | 12,785       | 49,2     | 17,7       | 0,35      | 996             |
| 2     | 8,217             | 34,219       | 3,441        | 2,2      | 4,8        | 0,18      | 995             |
| 3     | 9,000             | 424,138      | 39,068       | 27,0     | 54,1       | 0,17      | 955             |
| 4     | 11,600            | 341,092      | 16,987       | 21,7     | 23,5       | 0,18      | 529             |
| Total |                   | 1572,775     | 72,282       | 100,0    | 100,0      |           |                 |



## B. Light stability

Samples of ~ 2 mg of compounds **2**, **3** and **4**, were dissolved in of phosphate buffer (pH = 7, 0.5 ml) and exposed to intensive light. After 6 hours samples were analyzed using HPLC.

HPLC chromatogram of **2** after 6 h of light exposure.

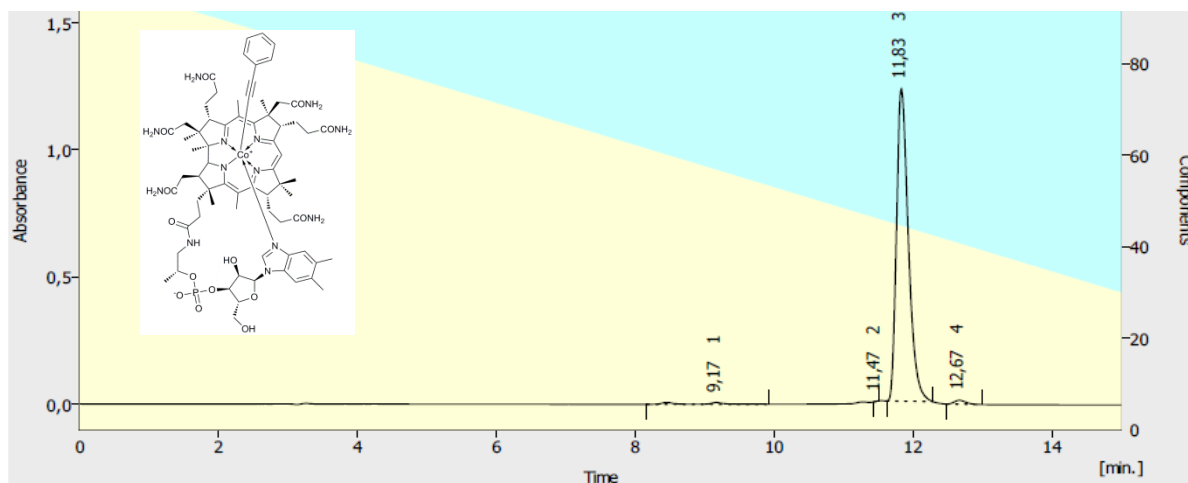

Result Table (Uncal - C:\Users\użytkownik\Desktop\mikołaj - chromatogramy\fotosztalność  
II\phenyl16\_1916-wrz-2013 - S 2850: Channel 2)

|       | Reten. Time<br>[min] | Area<br>[mAU.s] | Height<br>[mAU] | Area<br>[%] | Height<br>[%] | W05<br>[min] | Peak Purity<br>[-] |
|-------|----------------------|-----------------|-----------------|-------------|---------------|--------------|--------------------|
| 1     | 9,167                | 203,947         | 7,290           | 1,4         | 0,6           | 0,18         | 936                |
| 2     | 11,467               | 1,688           | 0,135           | 0,0         | 0,0           | 0,05         | 992                |
| 3     | 11,833               | 14596,347       | 1231,022        | 97,4        | 98,2          | 0,20         | 901                |
| 4     | 12,667               | 179,041         | 15,594          | 1,2         | 1,2           | 0,20         | 680                |
| Total |                      | 14981,022       | 1254,041        | 100,0       | 100,0         |              |                    |

HPLC chromatogram of **3** after 6 h of light exposure.

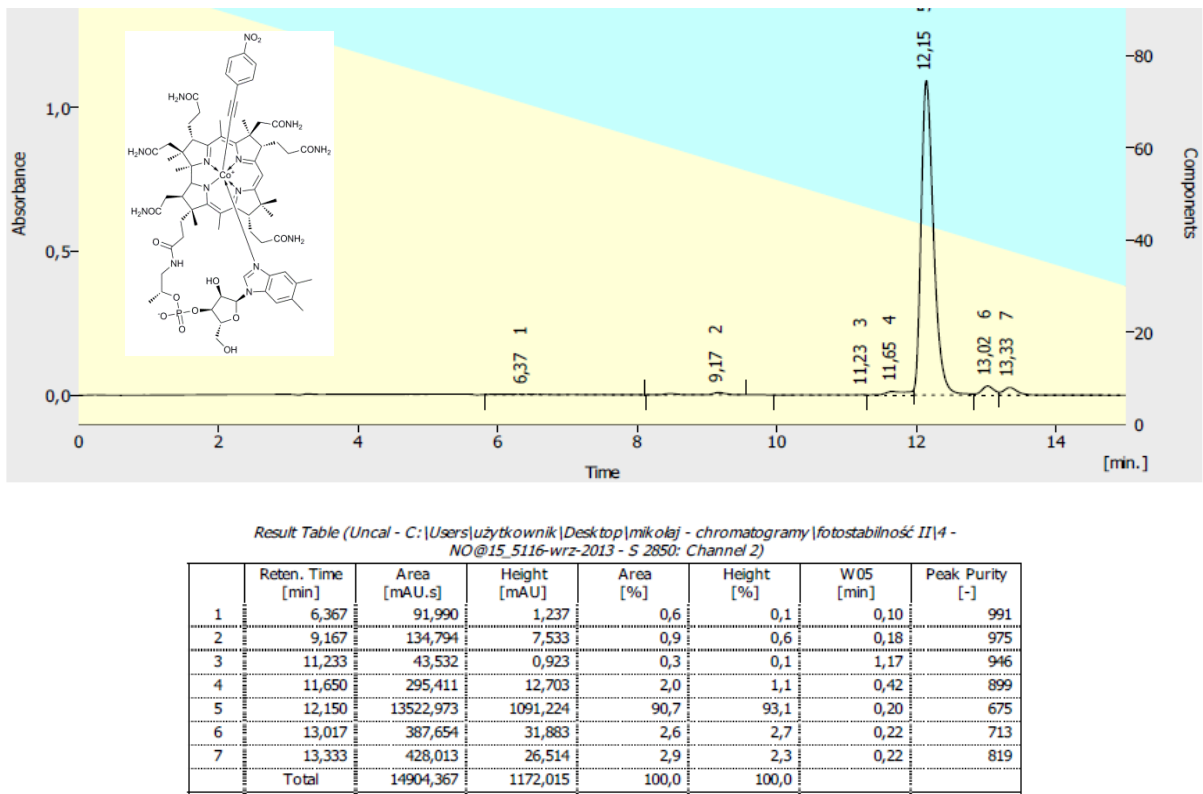

HPLC chromatogram of **4** after 6 h of light exposure.

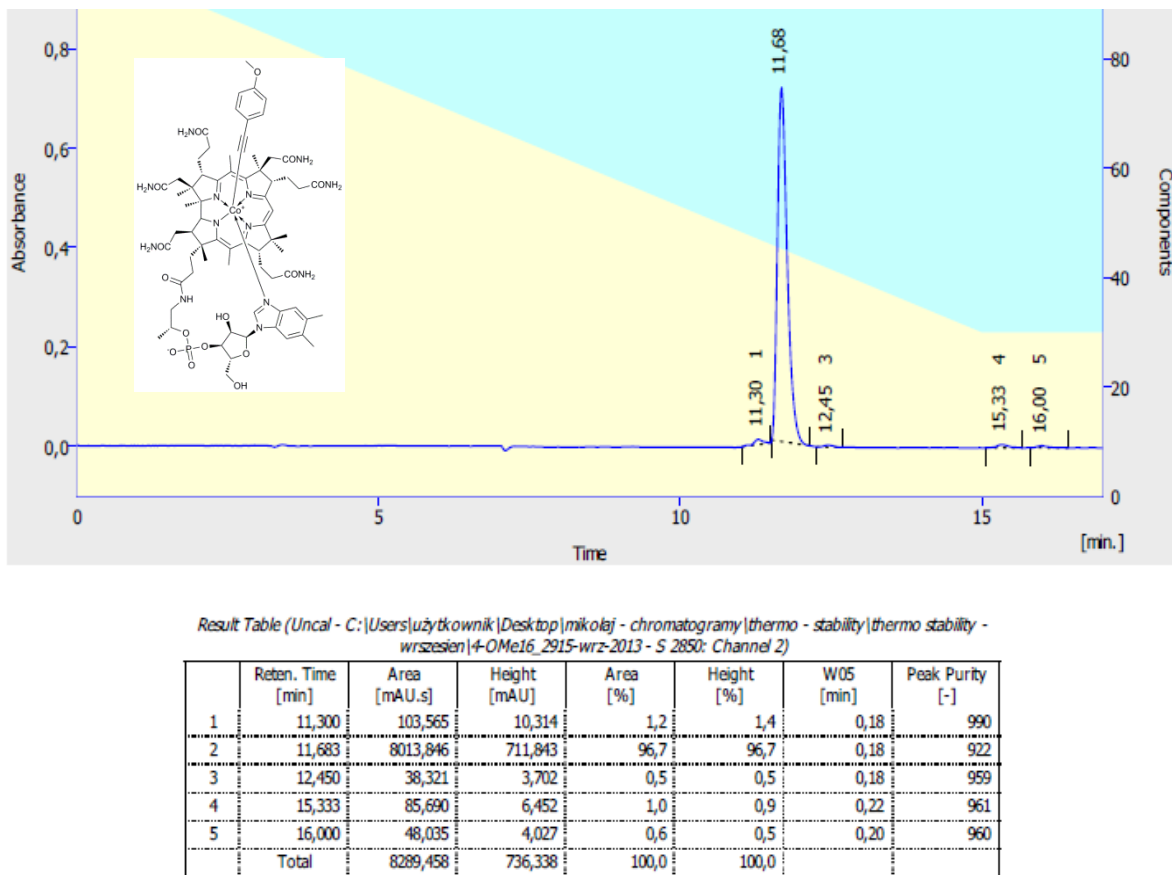

Crystallographic data for **2,3** and **4**

|                               | Compound                                                            |                                                                     |                                                                     |
|-------------------------------|---------------------------------------------------------------------|---------------------------------------------------------------------|---------------------------------------------------------------------|
|                               | <b>2</b>                                                            | <b>3</b>                                                            | <b>4</b>                                                            |
| Formula                       | C <sub>70</sub> H <sub>93</sub> N <sub>13</sub> O <sub>14</sub> PCo | C <sub>70</sub> H <sub>92</sub> N <sub>14</sub> O <sub>16</sub> PCo | C <sub>71</sub> H <sub>95</sub> N <sub>13</sub> O <sub>15</sub> PCo |
| Space group                   | P 2 <sub>1</sub> 2 <sub>1</sub> 2 <sub>1</sub>                      | P 2 <sub>1</sub> 2 <sub>1</sub> 2 <sub>1</sub>                      | P 2 <sub>1</sub> 2 <sub>1</sub> 2 <sub>1</sub>                      |
| Cell Lengths (Å)              | a 15.8504(3)<br>b 21.6765(4)<br>c 26.2587(5)                        | a 12.8063(3)<br>b 22.7406(6)<br>c 29.1298(7)                        | a 15.8339(4)<br>b 21.8117(6)<br>c 25.9778(7)                        |
| Cell Angles (°)               | α 90.00<br>β 90.00<br>γ 90.00                                       | α 90.00<br>β 90.00<br>γ 90.00                                       | α 90.00<br>β 90.00<br>γ 90.00                                       |
| Cell Volume (Å <sup>3</sup> ) | 9022                                                                | 8483.27                                                             | 8971.8                                                              |
| Z, Z'                         | Z: 4 Z': 0                                                          | Z: 4 Z': 0                                                          | Z: 4 Z': 0                                                          |
| R factor (%)                  | 4.22                                                                | 5.22                                                                | 5.83                                                                |
| CCDC deposition number        | 961230                                                              | 961228                                                              | 961229                                                              |

Crystal structure of **2** (hydrogen atoms omitted for clarity)

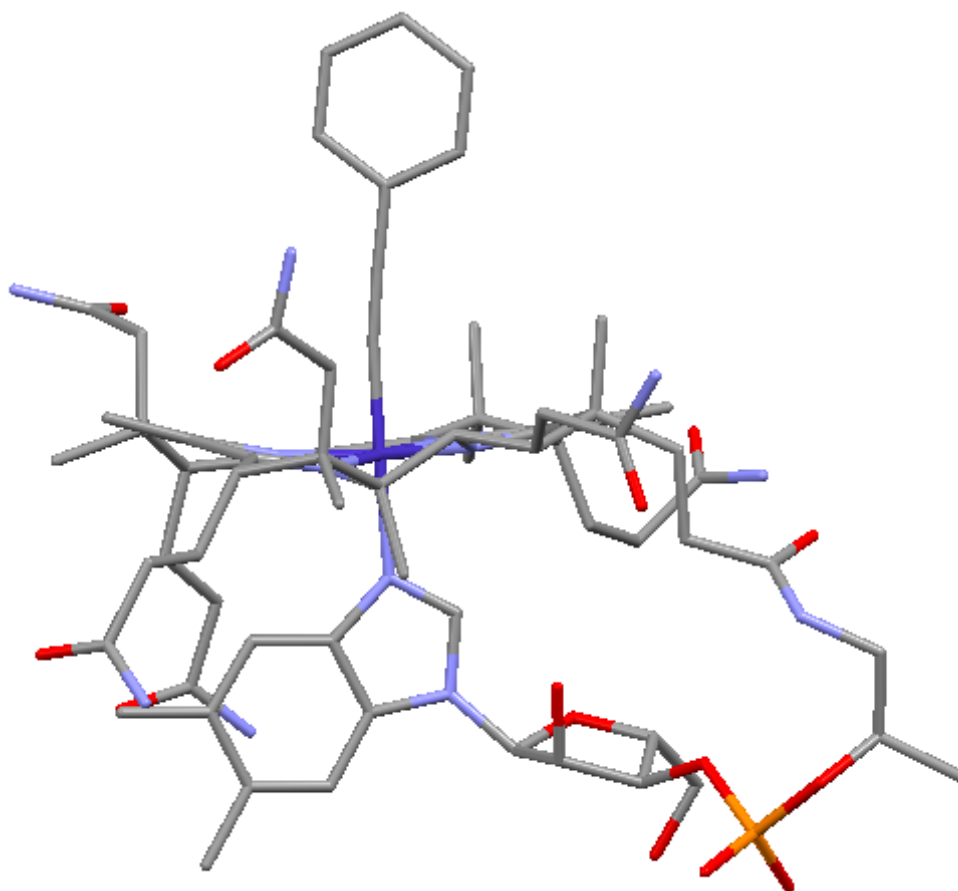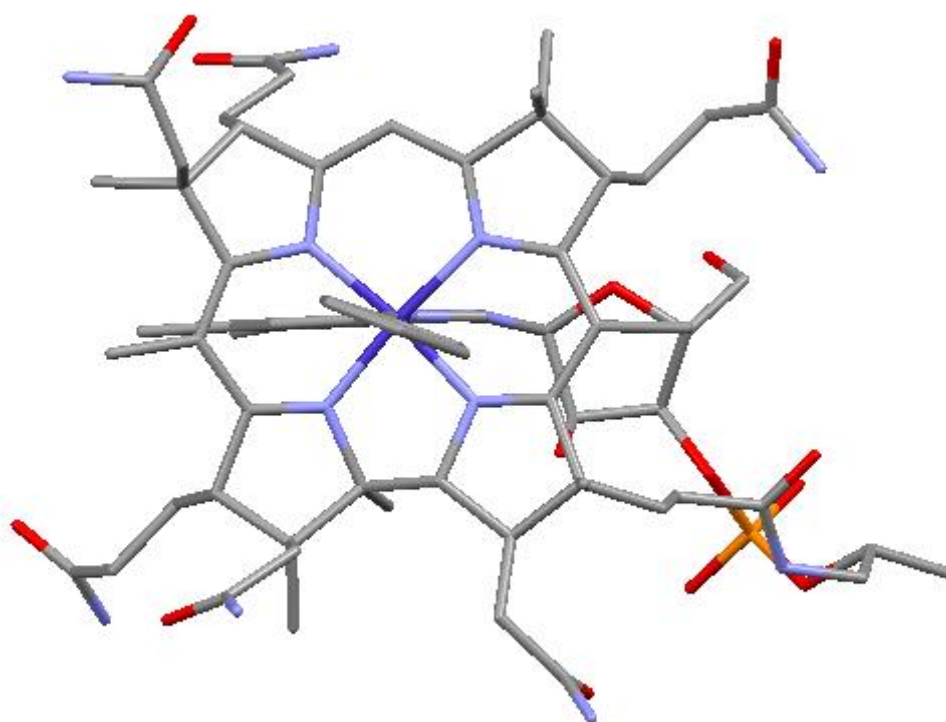

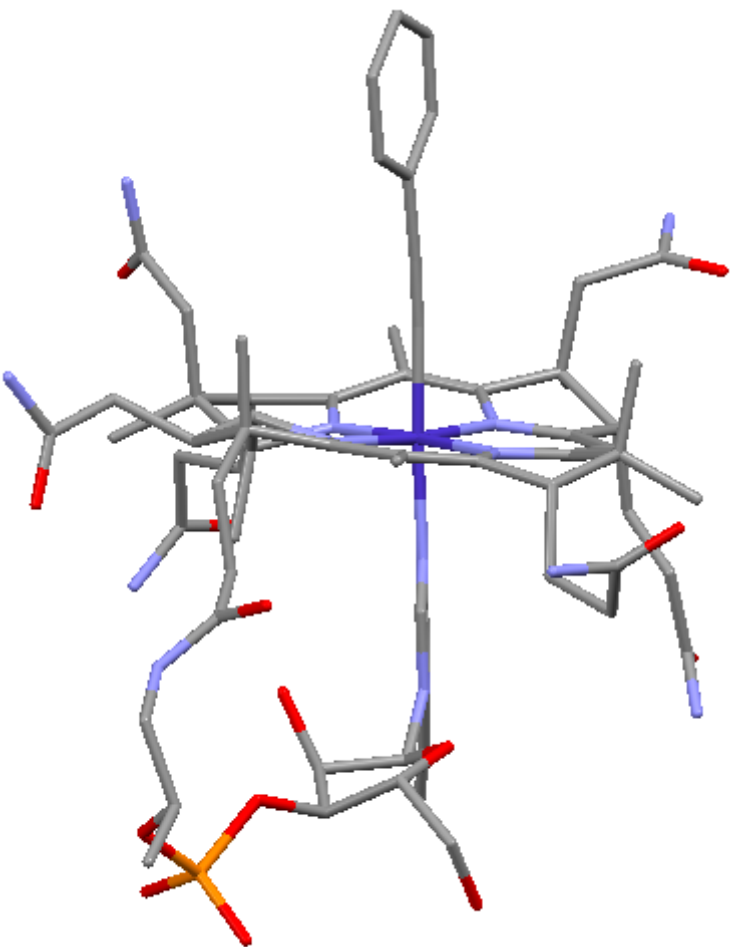

Crystal structure of **3** (hydrogen atoms omitted for clarity)

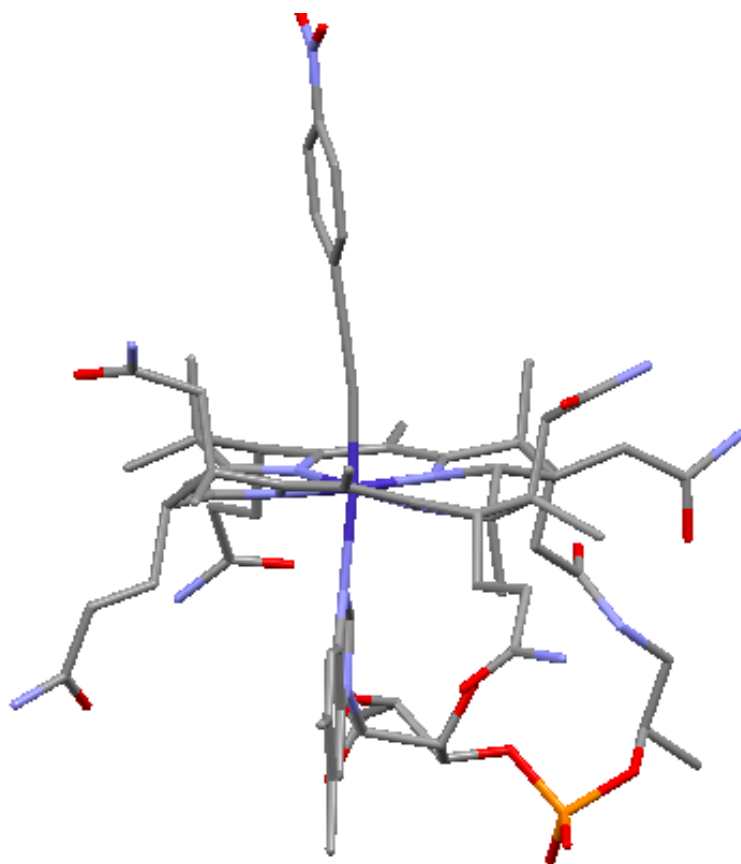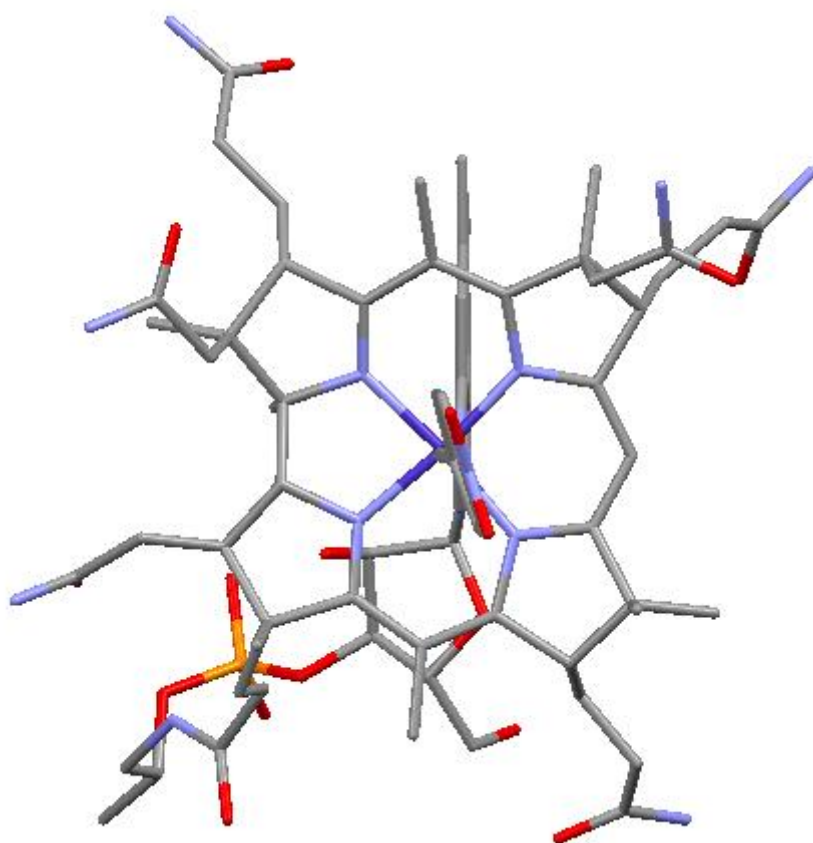

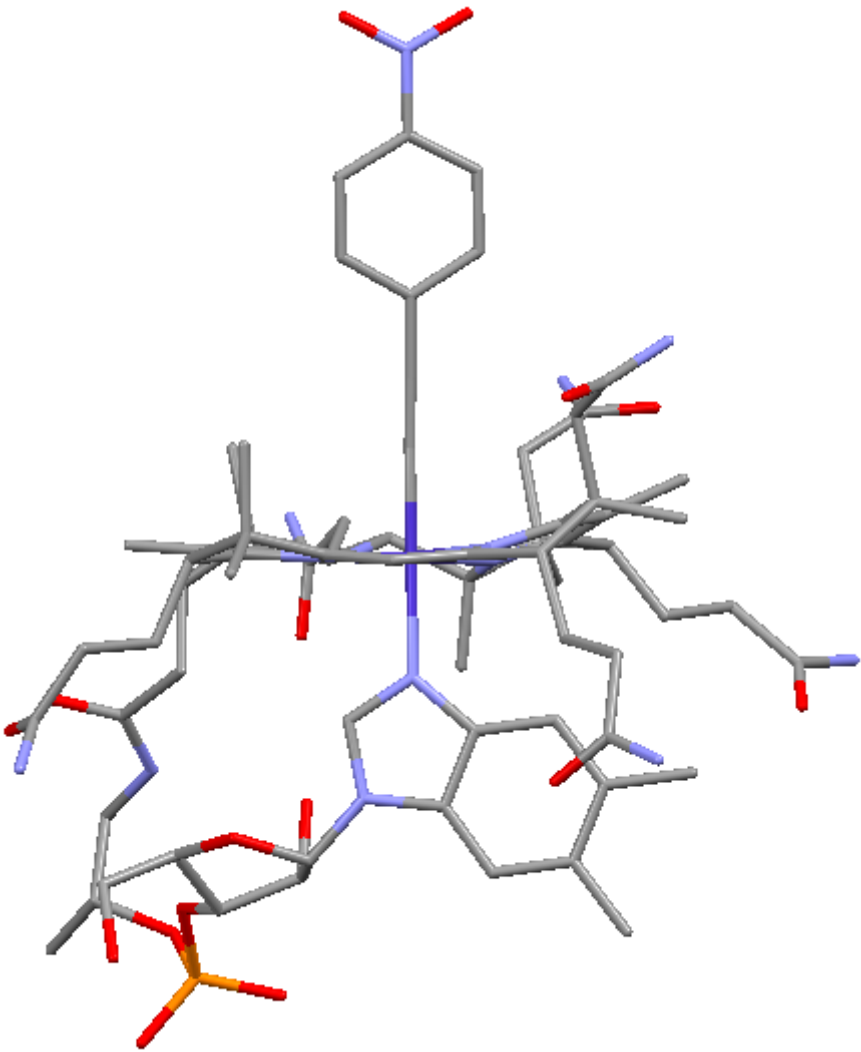

Crystal structure of **4** (hydrogen atoms omitted for clarity)

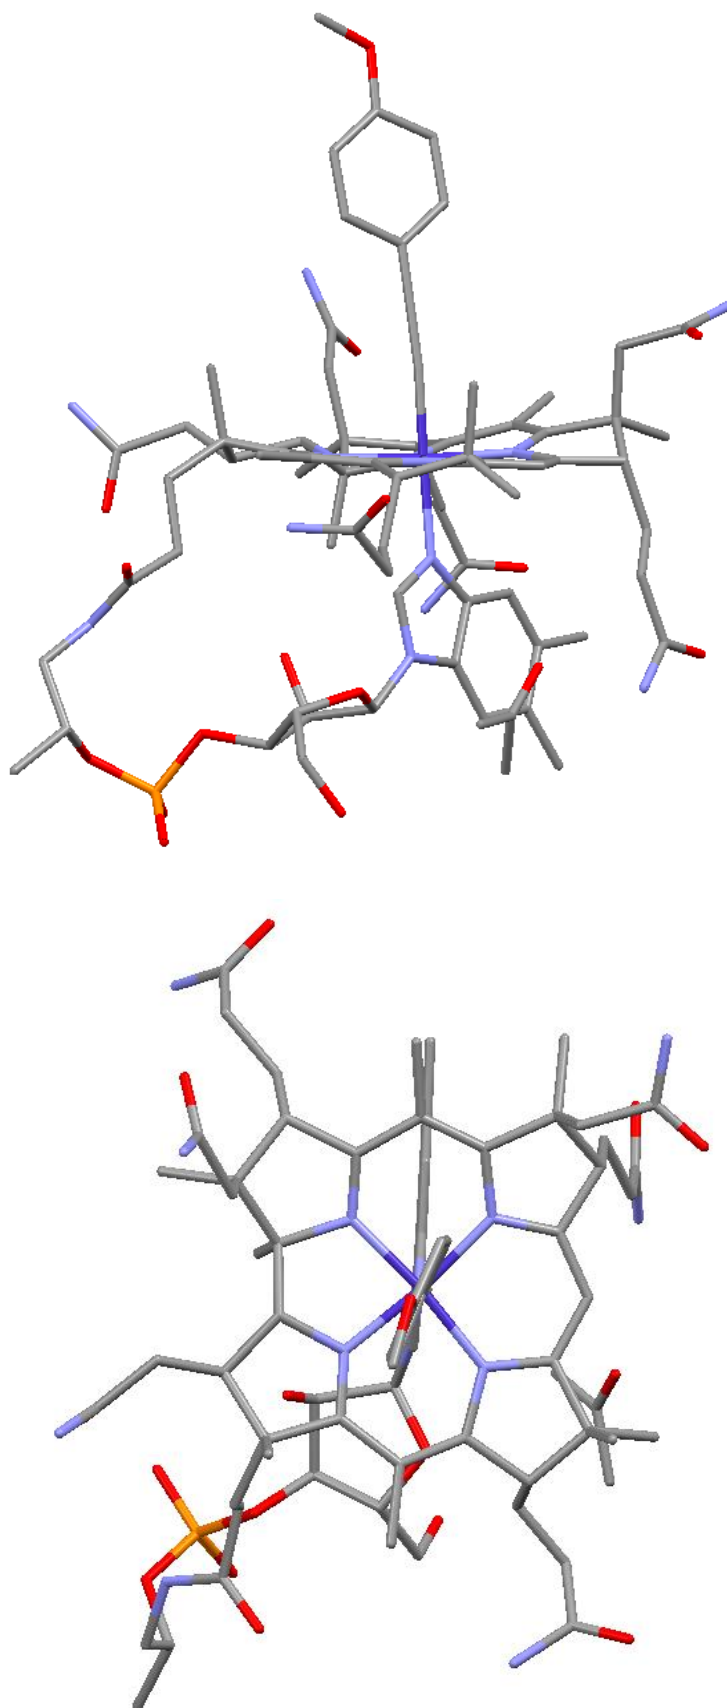



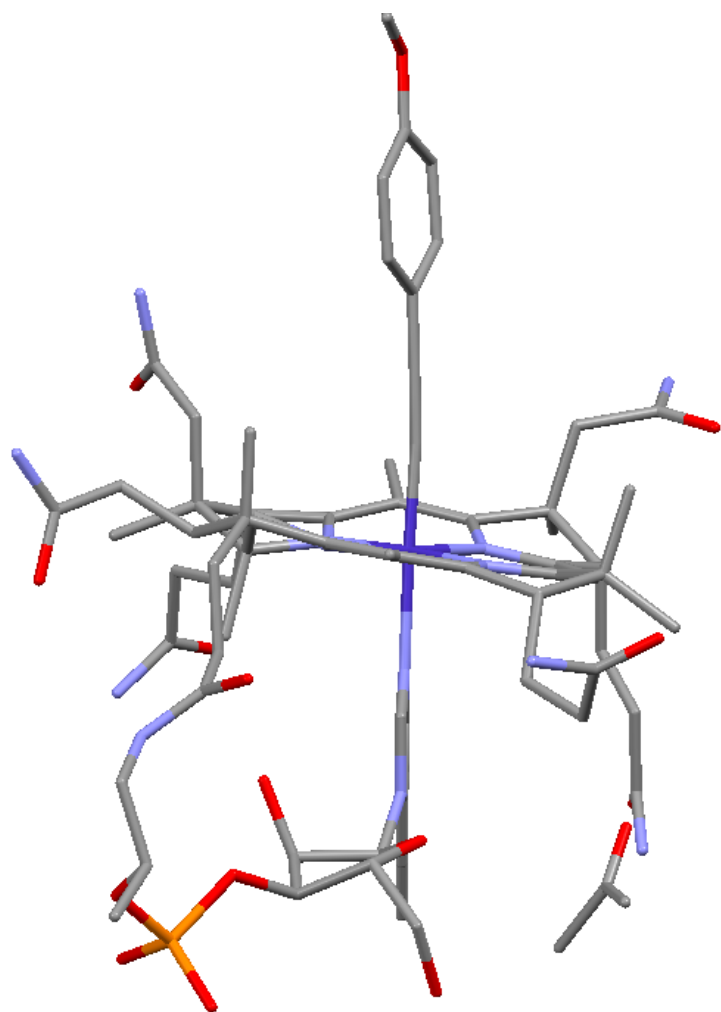

Supplement: c3cc47210h.pdf [file c3cc47210h.pdf]
